# Supplementary material for: Exploring the chemical and structural change of copper porphyrins upon charging by means of synchrotron X-ray absorption spectroscopy
Source: Royal Society of Chemistry journal article supplement (doi:10.1039/d4ya00242c), 2024-01-01
Supplement: d4ya00242c7.pdf [file d4ya00242c7.pdf]

## **Supporting Information: Exploring the chemical and structural change of copper porphyrins upon charging by means of synchrotron X-ray absorption spectroscopy**

Thomas Smok<sup>a,b\*</sup>, Dr. Yang Hu<sup>a</sup>, Dr. Saibal Jana<sup>b</sup>, Dr. Frank Pammer<sup>a</sup>, Prof. Dr. Maximilian Fichtner<sup>a,b\*</sup>

(a) Helmholtz Institute Ulm (HIU), Electrochemical Energy Storage, Helmholtzstraße 11,  
89081 Ulm, Germany

(b) Institute of Nanotechnology, Karlsruhe Institute of Technology, Hermann-von-  
Helmholtz-Platz 1, 76344 Eggenstein-Leopoldshafen, Germany

\*corresponding authors: [m.fichtner@kit.edu](mailto:m.fichtner@kit.edu), [thomas.smok@kit.edu](mailto:thomas.smok@kit.edu)

## Supporting figures

### 1. *Ex-situ* powder diffraction

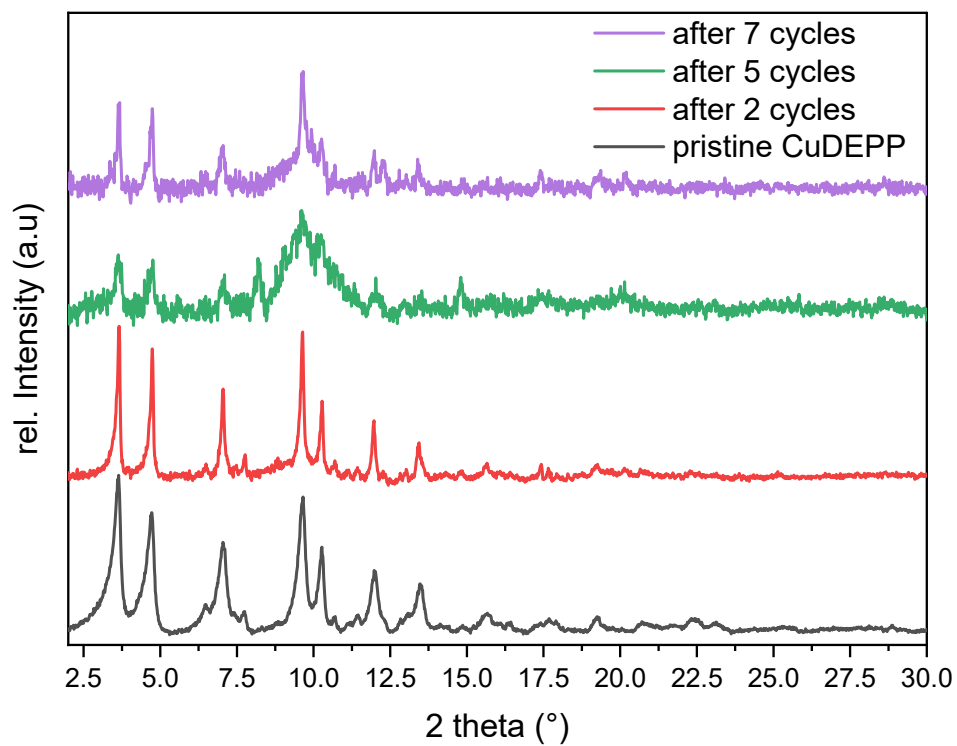

**Figure S 1:** *Ex-situ* post mortem analysis of CuDEPP-X-ray diffraction pattern compared by cycle number.

## 2. Theoretical calculations

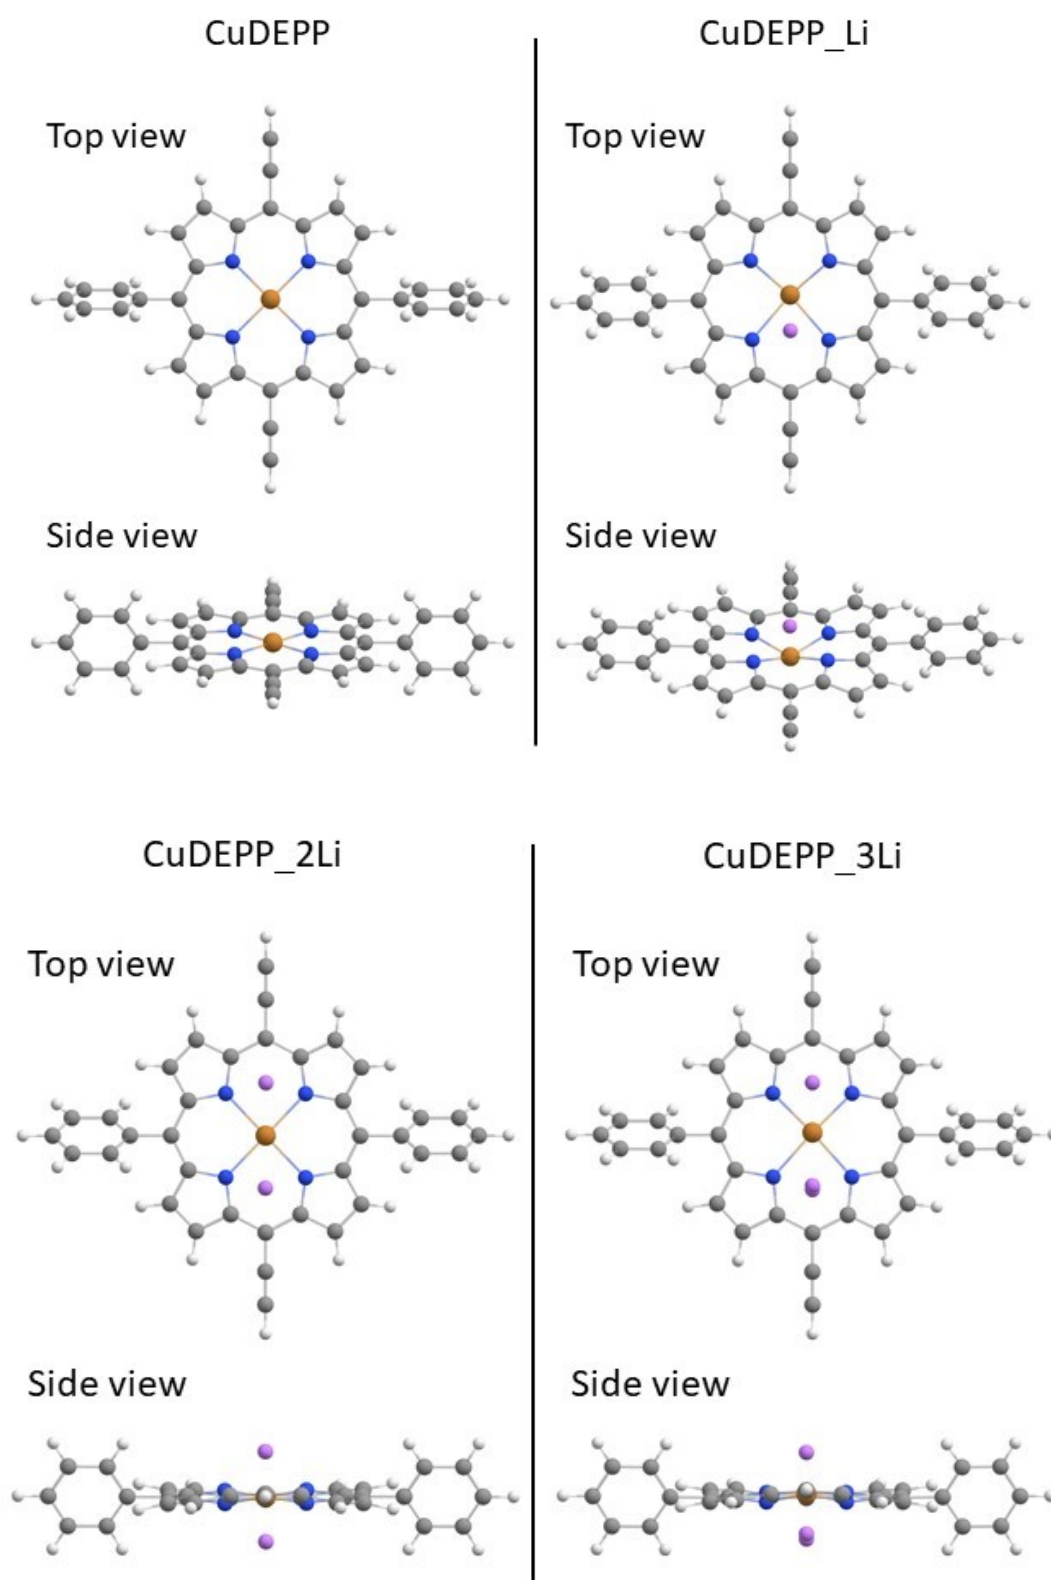

**Figure S 2:** Molecular structure of CuDEPP in pristine state and after the insertion of one, two and three Lithium ions.

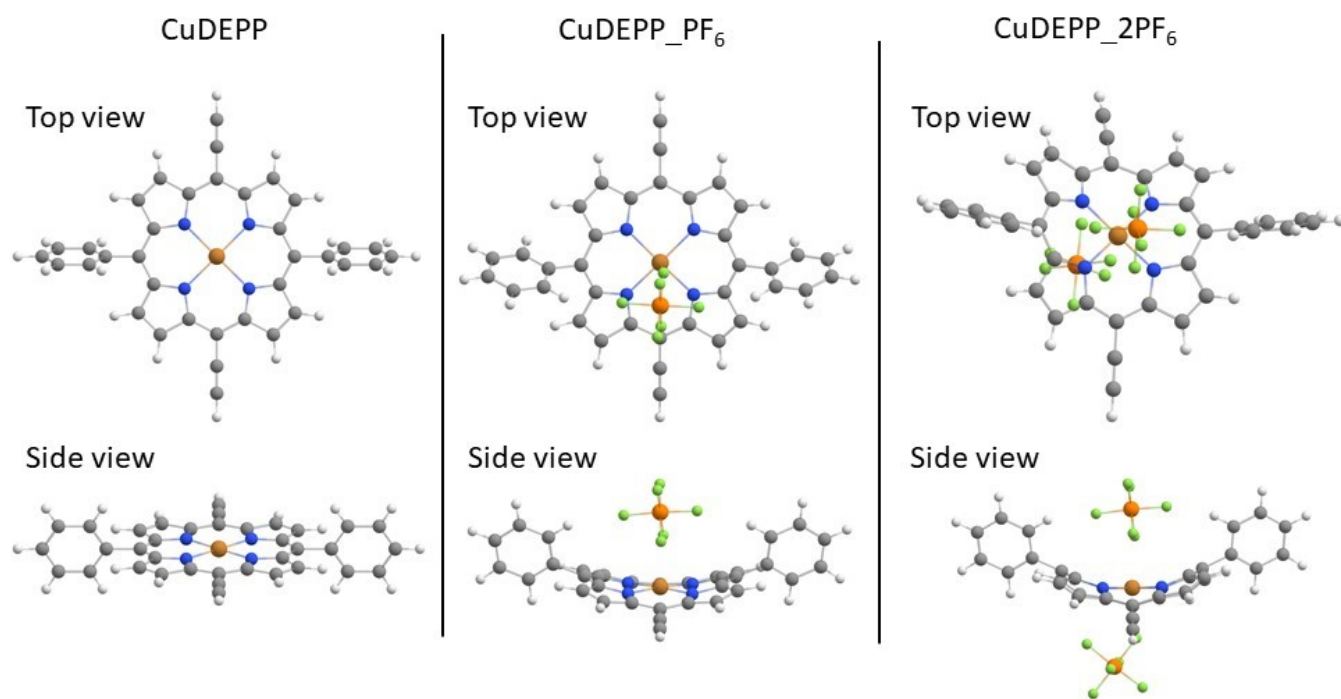

**Figure S 3:** Bending of molecular structure of CuDEPP after insertion of one and two  $\text{PF}_6^-$ -anions into the electrodes.

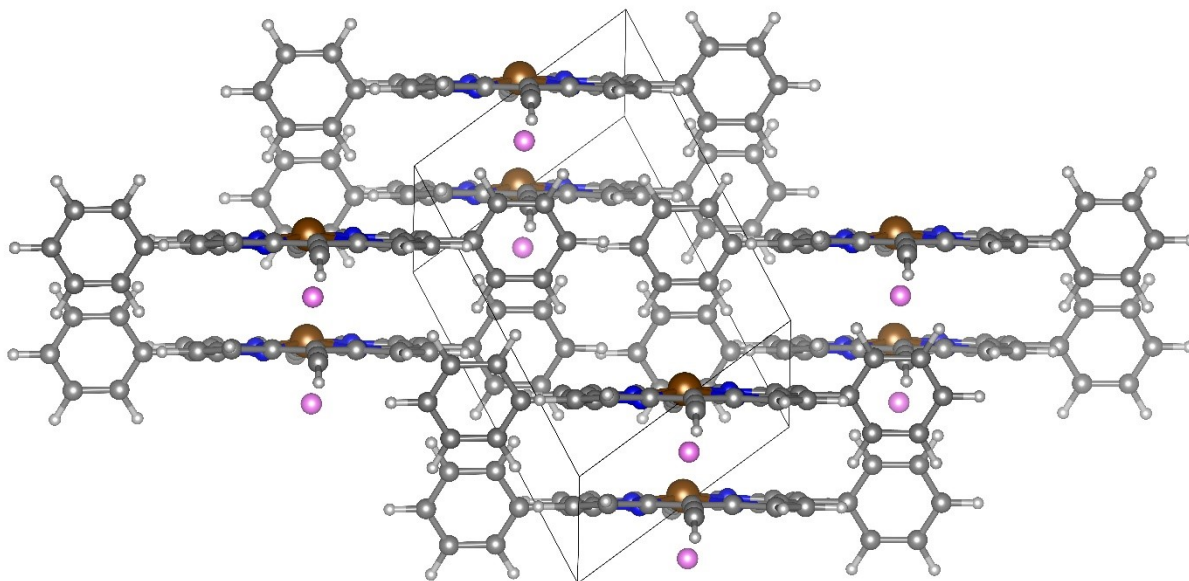

**Figure S 4:** Theoretical crystal structure when one lithium ion (pink) gets inserted into CuDEPP-electrodes.

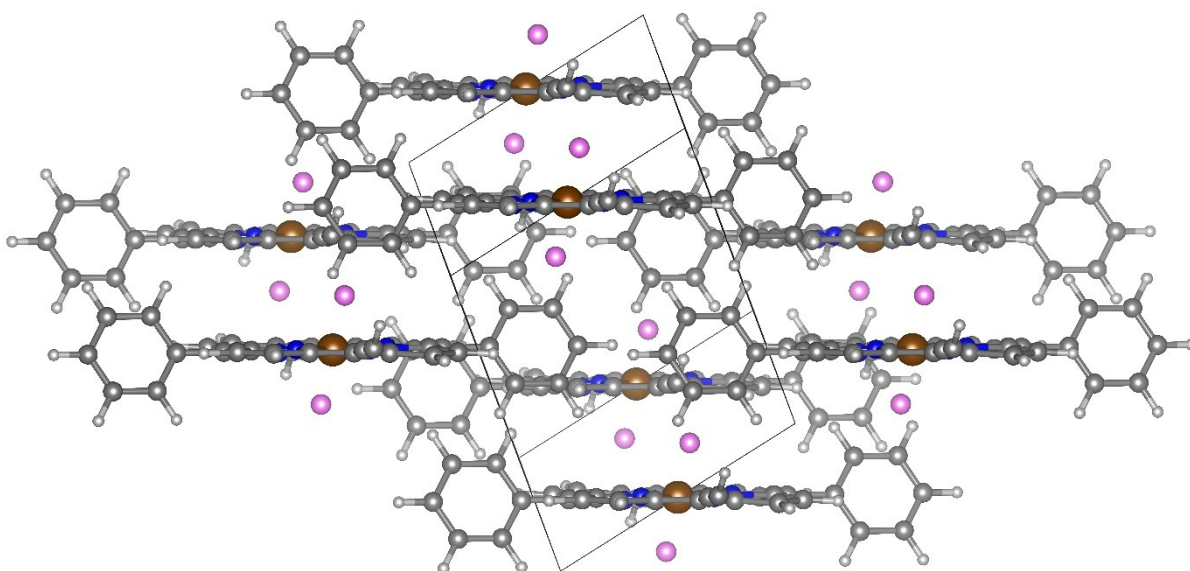

**Figure S 5:** Theoretical crystal structure when two lithium ions (pink) get inserted into CuDEPP-electrodes.

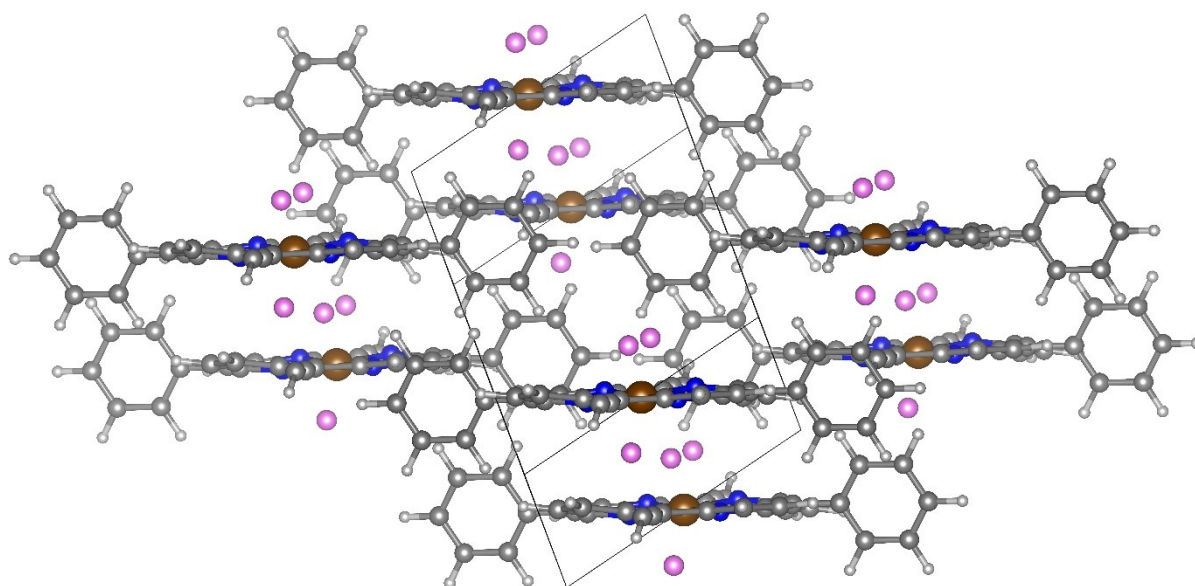

**Figure S 6:** Theoretical crystal structure when three lithium ions (pink) get inserted into CuDEPP-electrodes.

### 3. Detail XANES spectra

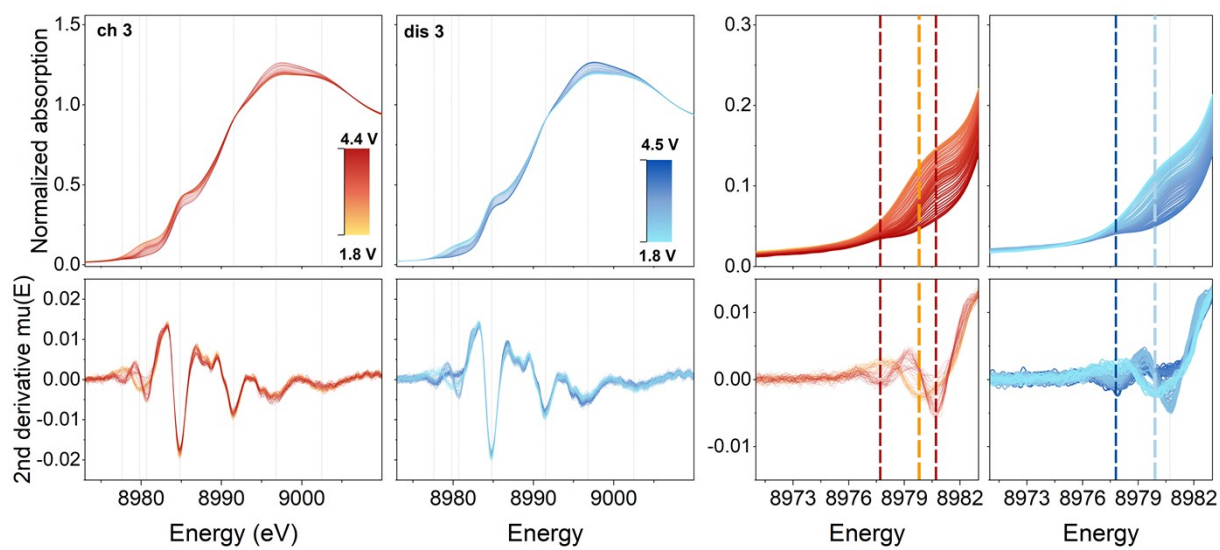

**Figure S 7:** Evolution of Cu K-edge XANES features from the 3<sup>rd</sup> cycle of CuDEPP.

## 4. PCA-analysis

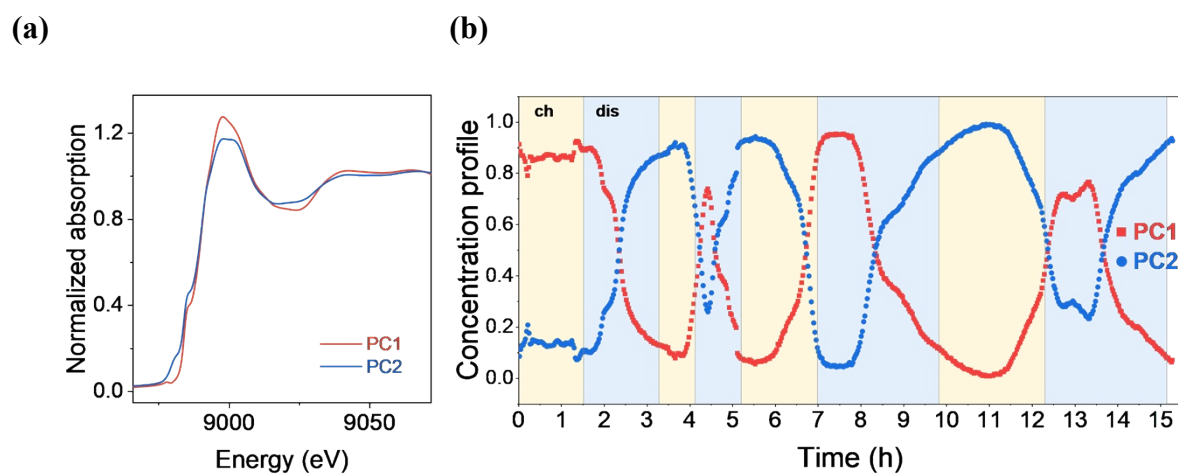

**Figure S 8:** (a) pure spectra (left) extracted by MCR-ALS and the concentration profile (right); (b) a summary of TS-YH-12 in charged 4.5V and discharged 1.8 V.



## 5. EXAFS fitting with FEFF paths calculated from different structure models

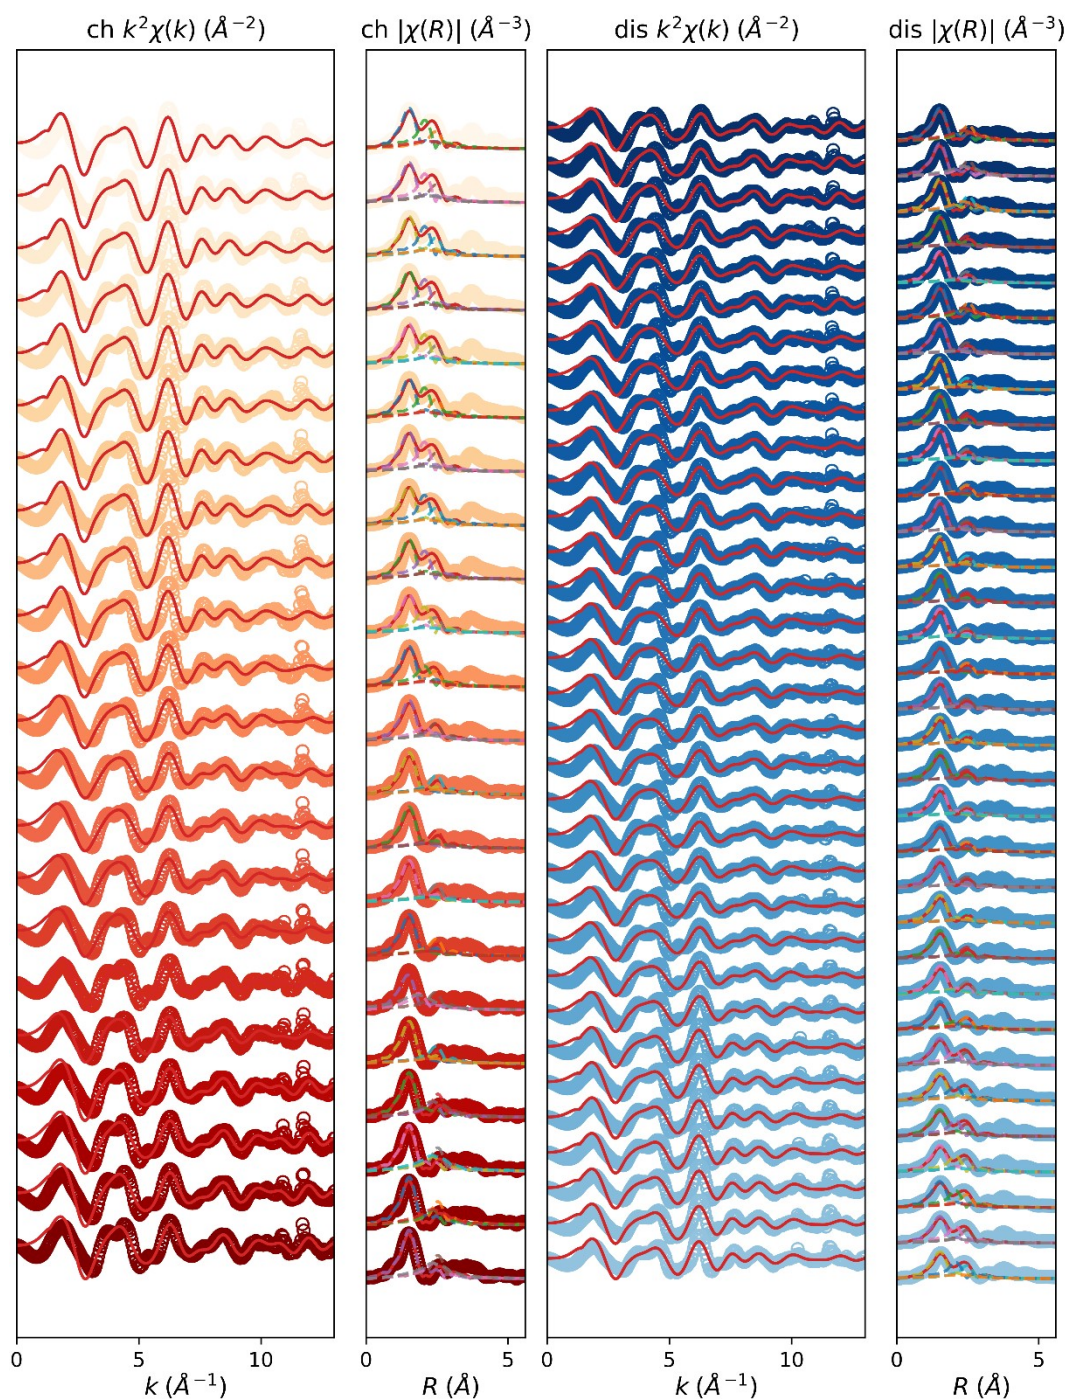

**Figure S 9:** Example of shell fitting for the third cycle using the 1Li structure model: Lighter-colored indicate lower voltages and darker colors for the higher voltages. Here spectra and fitting from every third acquisition are shown. Orange-to-red circles represent the spectra from charged, and blue for the discharged. Red lines denote the fitted results; dash lines indicate the paths included in the fitting.

**Table S1:** Shell fitting parameters for charged (4.5V) and discharged (1.8V) states. r-factor represents the relative error of the fit and data;  $\Delta E_0$ , R and  $\sigma^2$  are the energy shifts, half-path length and the disordering factor (mean-square relative displacement in R). Cu-N, Cu-C1 and Cu-C2 are single-scattering paths, for which R equals the interatomic distances; Cu-C-N is a multi-scattering path. Paths degeneracy of Cu-N and Cu-C-N are fixed according to the FEFF calculation model, and that of Cu-C are splitting half and half into Cu-C1 and Cu-C2.

| Data |          | Fitting parameters (S02 = 0.9, all coordination numbers are fixed) |      |                    |                               |       |                    |                               |        |                    |                               |         |                    |                               |
|------|----------|--------------------------------------------------------------------|------|--------------------|-------------------------------|-------|--------------------|-------------------------------|--------|--------------------|-------------------------------|---------|--------------------|-------------------------------|
| 4.5V | r-facotr | E0                                                                 | Cu-N |                    |                               | Cu-C  |                    |                               | Cu-C-N |                    |                               |         |                    |                               |
|      |          |                                                                    | CN   | R ( $\text{\AA}$ ) | $\sigma^2$ ( $\text{\AA}^2$ ) | CN    | R ( $\text{\AA}$ ) | $\sigma^2$ ( $\text{\AA}^2$ ) | CN     | R ( $\text{\AA}$ ) | $\sigma^2$ ( $\text{\AA}^2$ ) |         |                    |                               |
| C1   | 0.018    | -7(1)                                                              |      | 1.98(1)            | 0.004(1)                      |       | 3.01(1)            | 0.004(1)                      |        |                    |                               | 3.18(3) | 0.014(5)           |                               |
| C2   | 0.019    | -6(1)                                                              |      | 2.00(1)            | 0.006(1)                      |       | 3.03(1)            | 0.006(2)                      |        |                    |                               | 3.18(2) | 0.011(4)           |                               |
| C3   | 0.022    | -7(1)                                                              | 4    | 1.98(1)            | 0.004(1)                      | 8     | 3.03(1)            | 0.007(2)                      |        |                    | 16                            | 3.20(3) | 0.012(6)           |                               |
| C4   | 0.021    | -7(1)                                                              |      | 1.98(1)            | 0.007(1)                      |       | 3.02(1)            | 0.009(2)                      |        |                    |                               | 3.20(3) | 0.019(7)           |                               |
| 1.8V | r-facotr | E0                                                                 | Cu-N |                    |                               | Cu-C1 |                    |                               | Cu-C2  |                    |                               | Cu-C-N  |                    |                               |
|      |          |                                                                    | CN   | R ( $\text{\AA}$ ) | $\sigma^2$ ( $\text{\AA}^2$ ) | CN    | R ( $\text{\AA}$ ) | $\sigma^2$ ( $\text{\AA}^2$ ) | CN     | R ( $\text{\AA}$ ) | $\sigma^2$ ( $\text{\AA}^2$ ) | CN      | R ( $\text{\AA}$ ) | $\sigma^2$ ( $\text{\AA}^2$ ) |
| C1   | 0.010    | 6(1)                                                               |      | 1.92(1)            | 0.007(1)                      |       | 3.02(1)            | 0.002(2)                      |        | 2.56(1)            | 0.003(1)                      |         | 2.86(5)            | 0.03(1)                       |
| C2   | 0.016    | 6(2)                                                               | 4    | 2.02(1)            | 0.006(1)                      | 5     | 3.00(2)            | 0.004(3)                      | 5      | 2.58(2)            | 0.003(1)                      | 16      | 2.91(5)            | 0.02(1)                       |
| C3   | 0.012    | 7(2)                                                               |      | 1.93(1)            | 0.007(1)                      |       | 3.01(1)            | 0.002(2)                      |        | 2.58(2)            | 0.004(1)                      |         | 2.93(5)            | 0.030                         |
| C4   | 0.014    | 7(2)                                                               |      | 2.00(1)            | 0.006(1)                      |       | 3.00(2)            | 0.004(2)                      |        | 2.58(2)            | 0.003(1)                      |         | 2.94(5)            | 0.030(2)                      |

## 6. Fitted parameters based on the different structure models

(a) Structure model with one Li

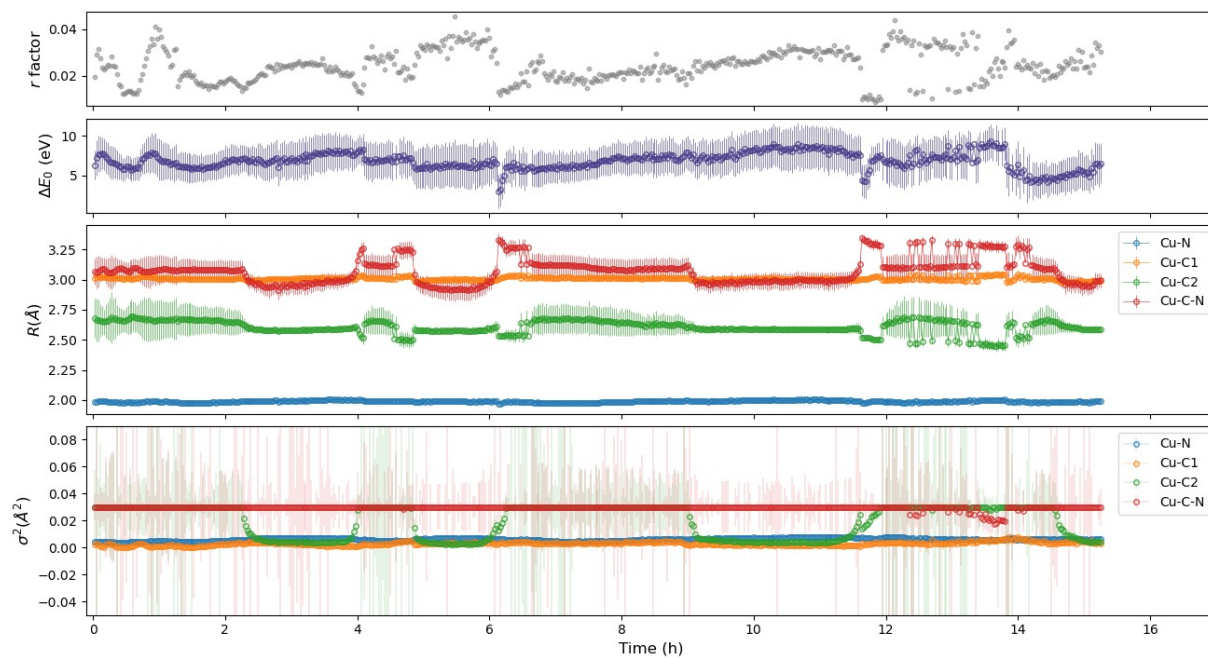

(b) Structure model with two Li

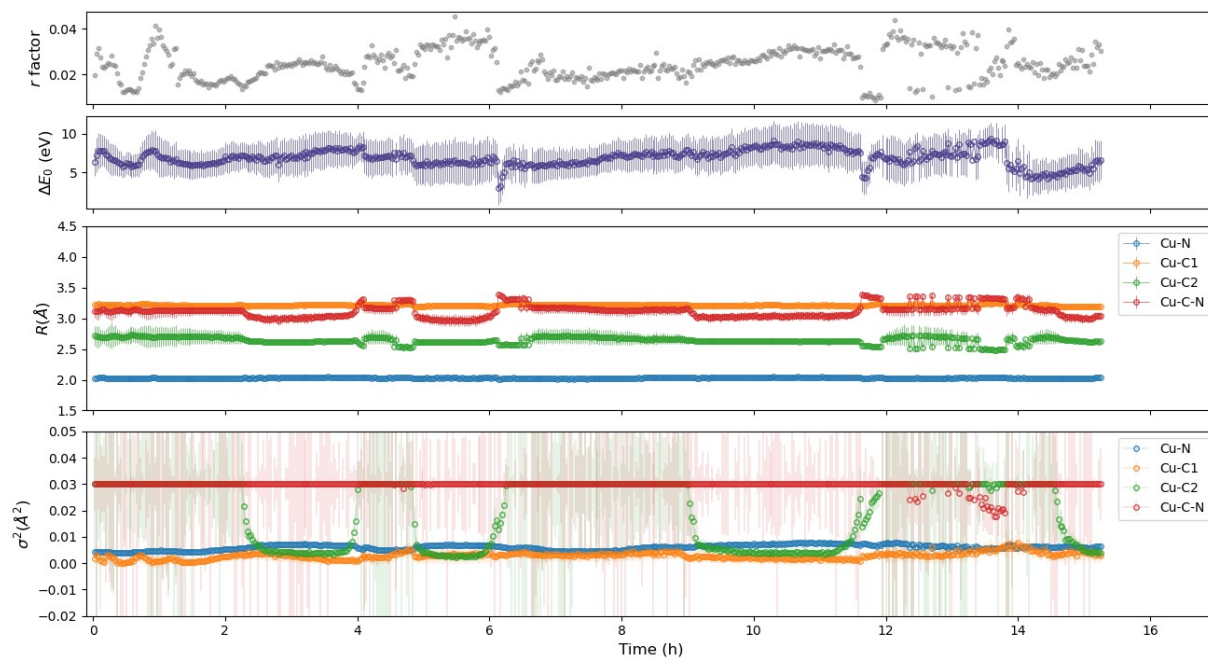

(c) Structure model with three Li

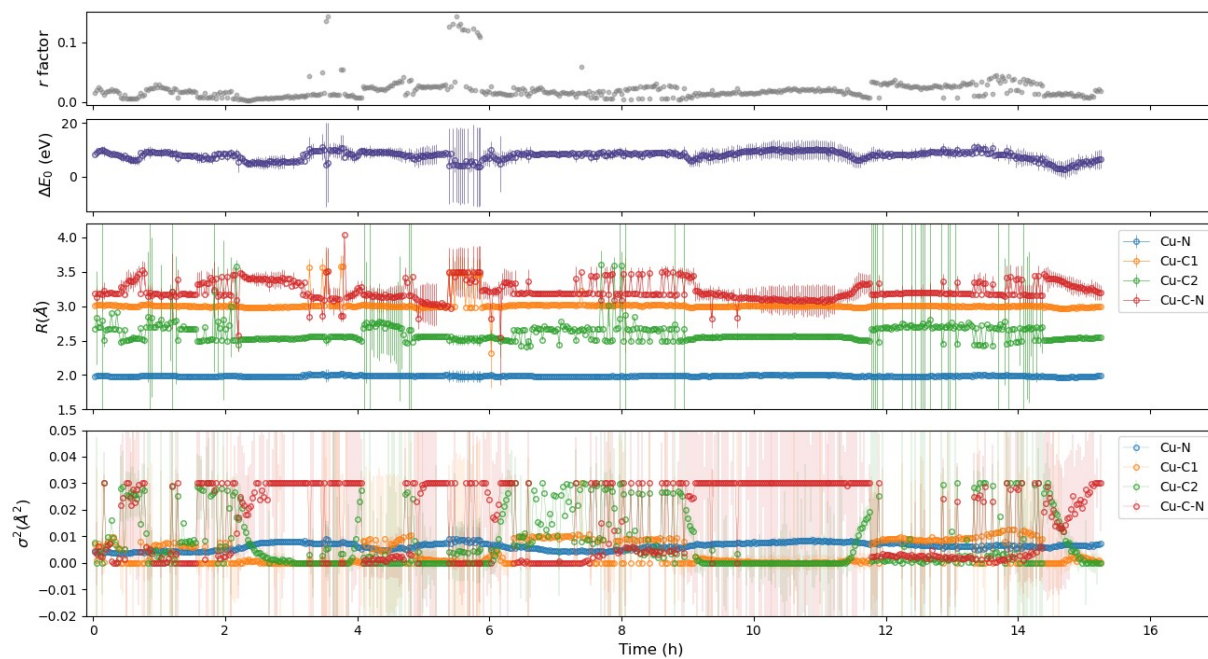

**Figure S 10:** Evolution of fitted parameters based on FEFF fitting using the structure model with one (a), two (b) and three (c) lithium:  $r$ -factor represents the relative error of the fit and data;  $\Delta E_0$ ,  $R$  and  $\sigma^2$  are the energy shifts, half-path length and the disordering factor (mean-square relative displacement in  $R$ ).

## 7. Tables of XANES Edge Energies

**Table S2:** The energy position corresponding to edge step 0.3, 0.5 and 0.7 on the rising edge.

| E (V, vs. Li <sup>+</sup> /Li) | Energy at<br>edge step = 0.3 (eV) | Energy at<br>edge step = 0.5 (eV) | Energy at<br>edge step = 0.7 (eV) |
|--------------------------------|-----------------------------------|-----------------------------------|-----------------------------------|
| 3.22                           | 8983.72                           | 8987.55                           | 8989.79                           |
| 3.22                           | 8983.72                           | 8987.56                           | 8989.81                           |
| 3.22                           | 8983.72                           | 8987.55                           | 8989.79                           |
| 3.22                           | 8983.70                           | 8987.52                           | 8989.78                           |
| 3.22                           | 8983.71                           | 8987.51                           | 8989.78                           |
| 3.22                           | 8983.72                           | 8987.50                           | 8989.77                           |
| 3.24                           | 8983.72                           | 8987.45                           | 8989.75                           |
| 3.34                           | 8983.74                           | 8987.42                           | 8989.74                           |
| 3.44                           | 8983.75                           | 8987.36                           | 8989.71                           |
| 3.54                           | 8983.77                           | 8987.28                           | 8989.67                           |
| 3.64                           | 8983.78                           | 8987.21                           | 8989.63                           |
| 3.74                           | 8983.82                           | 8987.13                           | 8989.61                           |
| 3.84                           | 8983.84                           | 8987.05                           | 8989.57                           |
| 3.94                           | 8983.87                           | 8987.03                           | 8989.56                           |
| 4.04                           | 8983.89                           | 8987.02                           | 8989.53                           |
| 4.14                           | 8983.91                           | 8987.03                           | 8989.53                           |
| 4.24                           | 8983.95                           | 8987.08                           | 8989.54                           |
| 4.34                           | 8983.97                           | 8987.12                           | 8989.54                           |
| 4.44                           | 8984.02                           | 8987.19                           | 8989.57                           |
| 4.50                           | 8984.05                           | 8987.28                           | 8989.60                           |
| 4.50                           | 8984.08                           | 8987.36                           | 8989.62                           |
| 4.50                           | 8984.10                           | 8987.42                           | 8989.64                           |
| 4.50                           | 8984.13                           | 8987.49                           | 8989.66                           |
| 4.50                           | 8984.15                           | 8987.52                           | 8989.68                           |
| 4.50                           | 8984.16                           | 8987.57                           | 8989.70                           |
| 4.50                           | 8984.16                           | 8987.57                           | 8989.69                           |
| 4.50                           | 8984.16                           | 8987.58                           | 8989.70                           |
| 4.50                           | 8984.14                           | 8987.55                           | 8989.68                           |
| 4.50                           | 8984.12                           | 8987.49                           | 8989.67                           |
| 4.50                           | 8984.07                           | 8987.41                           | 8989.64                           |
| 4.50                           | 8984.03                           | 8987.33                           | 8989.61                           |
| 4.50                           | 8983.99                           | 8987.26                           | 8989.58                           |
| 4.50                           | 8983.97                           | 8987.20                           | 8989.56                           |
| 4.50                           | 8983.96                           | 8987.14                           | 8989.55                           |
| 4.50                           | 8983.94                           | 8987.11                           | 8989.53                           |
| 4.50                           | 8983.93                           | 8987.07                           | 8989.52                           |
| 4.50                           | 8983.93                           | 8987.05                           | 8989.52                           |
| 4.50                           | 8983.94                           | 8987.04                           | 8989.52                           |
| 4.50                           | 8983.94                           | 8987.03                           | 8989.51                           |
| 4.50                           | 8983.93                           | 8987.01                           | 8989.50                           |
| 4.50                           | 8983.93                           | 8987.01                           | 8989.51                           |

---



---

|      |         |         |         |
|------|---------|---------|---------|
| 4.50 | 8983.92 | 8987.05 | 8989.53 |
| 4.50 | 8983.89 | 8987.36 | 8989.68 |
| 4.50 | 8983.86 | 8987.58 | 8989.78 |
| 4.50 | 8983.83 | 8987.63 | 8989.80 |
| 4.50 | 8983.82 | 8987.64 | 8989.80 |
| 4.50 | 8983.82 | 8987.64 | 8989.81 |
| 4.50 | 8983.80 | 8987.62 | 8989.80 |
| 4.50 | 8983.79 | 8987.61 | 8989.80 |
| 4.50 | 8983.78 | 8987.60 | 8989.79 |
| 4.50 | 8983.70 | 8987.48 | 8989.75 |
| 4.50 | 8983.68 | 8987.47 | 8989.74 |
| 4.50 | 8983.68 | 8987.47 | 8989.76 |
| 4.50 | 8983.68 | 8987.45 | 8989.75 |
| 4.50 | 8983.67 | 8987.44 | 8989.74 |
| 4.46 | 8983.67 | 8987.43 | 8989.74 |
| 4.36 | 8983.67 | 8987.42 | 8989.74 |
| 4.26 | 8983.68 | 8987.41 | 8989.74 |
| 4.16 | 8983.69 | 8987.39 | 8989.73 |
| 4.06 | 8983.69 | 8987.41 | 8989.72 |
| 3.96 | 8983.70 | 8987.41 | 8989.72 |
| 3.86 | 8983.70 | 8987.42 | 8989.72 |
| 3.76 | 8983.70 | 8987.40 | 8989.72 |
| 3.66 | 8983.70 | 8987.41 | 8989.72 |
| 3.56 | 8983.70 | 8987.42 | 8989.72 |
| 3.46 | 8983.70 | 8987.44 | 8989.72 |
| 3.36 | 8983.70 | 8987.43 | 8989.71 |
| 3.26 | 8983.71 | 8987.46 | 8989.72 |
| 3.16 | 8983.70 | 8987.47 | 8989.73 |
| 3.06 | 8983.69 | 8987.46 | 8989.73 |
| 2.96 | 8983.69 | 8987.45 | 8989.74 |
| 2.86 | 8983.69 | 8987.46 | 8989.73 |
| 2.76 | 8983.69 | 8987.44 | 8989.74 |
| 2.66 | 8983.69 | 8987.48 | 8989.75 |
| 2.56 | 8983.70 | 8987.47 | 8989.75 |
| 2.46 | 8983.70 | 8987.46 | 8989.76 |
| 2.36 | 8983.70 | 8987.47 | 8989.75 |
| 2.26 | 8983.70 | 8987.45 | 8989.75 |
| 2.16 | 8983.70 | 8987.43 | 8989.73 |
| 2.06 | 8983.71 | 8987.41 | 8989.73 |
| 1.96 | 8983.71 | 8987.38 | 8989.71 |
| 1.86 | 8983.72 | 8987.34 | 8989.70 |
| 1.80 | 8983.72 | 8987.30 | 8989.68 |
| 1.80 | 8983.74 | 8987.28 | 8989.68 |
| 1.80 | 8983.76 | 8987.23 | 8989.65 |
| 1.80 | 8983.74 | 8987.15 | 8989.62 |
| 1.80 | 8983.75 | 8987.10 | 8989.60 |
| 1.80 | 8983.77 | 8987.07 | 8989.58 |

---



---

---



---

|      |         |         |         |
|------|---------|---------|---------|
| 1.80 | 8983.78 | 8987.00 | 8989.54 |
| 1.80 | 8983.79 | 8986.96 | 8989.53 |
| 1.80 | 8983.80 | 8986.91 | 8989.52 |
| 1.80 | 8983.80 | 8986.89 | 8989.48 |
| 1.80 | 8983.82 | 8986.87 | 8989.48 |
| 1.80 | 8983.82 | 8986.85 | 8989.47 |
| 1.80 | 8983.84 | 8986.86 | 8989.48 |
| 1.80 | 8983.83 | 8986.83 | 8989.46 |
| 1.80 | 8983.84 | 8986.85 | 8989.46 |
| 1.80 | 8983.84 | 8986.85 | 8989.45 |
| 1.80 | 8983.86 | 8986.87 | 8989.46 |
| 1.80 | 8983.86 | 8986.88 | 8989.46 |
| 1.80 | 8983.86 | 8986.89 | 8989.46 |
| 1.80 | 8983.87 | 8986.91 | 8989.46 |
| 1.80 | 8983.89 | 8986.96 | 8989.49 |
| 1.80 | 8983.90 | 8987.00 | 8989.50 |
| 1.80 | 8983.93 | 8987.07 | 8989.52 |
| 1.80 | 8983.95 | 8987.11 | 8989.53 |
| 1.80 | 8983.96 | 8987.17 | 8989.54 |
| 1.80 | 8983.98 | 8987.23 | 8989.56 |
| 1.80 | 8984.02 | 8987.32 | 8989.60 |
| 1.80 | 8984.05 | 8987.38 | 8989.63 |
| 1.80 | 8984.06 | 8987.42 | 8989.62 |
| 1.80 | 8984.09 | 8987.49 | 8989.63 |
| 1.80 | 8984.14 | 8987.57 | 8989.68 |
| 1.80 | 8984.16 | 8987.64 | 8989.70 |
| 1.80 | 8984.19 | 8987.69 | 8989.73 |
| 1.80 | 8984.20 | 8987.72 | 8989.72 |
| 1.80 | 8984.23 | 8987.78 | 8989.75 |
| 1.80 | 8984.25 | 8987.81 | 8989.76 |
| 1.84 | 8984.26 | 8987.83 | 8989.78 |
| 1.94 | 8984.27 | 8987.86 | 8989.79 |
| 2.04 | 8984.27 | 8987.86 | 8989.78 |
| 2.14 | 8984.28 | 8987.88 | 8989.79 |
| 2.24 | 8984.29 | 8987.89 | 8989.79 |
| 2.34 | 8984.29 | 8987.90 | 8989.80 |
| 2.44 | 8984.30 | 8987.90 | 8989.80 |
| 2.54 | 8984.31 | 8987.92 | 8989.82 |
| 2.64 | 8984.30 | 8987.91 | 8989.80 |
| 2.74 | 8984.30 | 8987.91 | 8989.80 |
| 2.84 | 8984.32 | 8987.93 | 8989.81 |
| 2.94 | 8984.30 | 8987.92 | 8989.80 |
| 3.04 | 8984.30 | 8987.91 | 8989.80 |
| 3.14 | 8984.31 | 8987.93 | 8989.80 |
| 3.01 | 8984.31 | 8987.93 | 8989.81 |
| 3.11 | 8984.31 | 8987.93 | 8989.81 |
| 3.21 | 8984.31 | 8987.93 | 8989.81 |

---



---

---



---

|      |         |         |         |
|------|---------|---------|---------|
| 3.31 | 8984.31 | 8987.93 | 8989.81 |
| 3.41 | 8984.30 | 8987.92 | 8989.80 |
| 3.51 | 8984.31 | 8987.93 | 8989.80 |
| 3.61 | 8984.31 | 8987.93 | 8989.80 |
| 3.71 | 8984.31 | 8987.94 | 8989.81 |
| 3.81 | 8984.31 | 8987.93 | 8989.81 |
| 3.91 | 8984.30 | 8987.92 | 8989.80 |
| 4.01 | 8984.31 | 8987.94 | 8989.81 |
| 4.11 | 8984.30 | 8987.93 | 8989.80 |
| 4.21 | 8984.30 | 8987.94 | 8989.82 |
| 4.31 | 8984.31 | 8987.96 | 8989.84 |
| 4.41 | 8984.34 | 8987.96 | 8989.84 |
| 4.49 | 8984.33 | 8987.95 | 8989.82 |
| 4.39 | 8984.29 | 8987.91 | 8989.81 |
| 4.29 | 8984.27 | 8987.90 | 8989.80 |
| 4.19 | 8984.27 | 8987.90 | 8989.80 |
| 4.09 | 8984.26 | 8987.89 | 8989.80 |
| 3.99 | 8984.25 | 8987.86 | 8989.78 |
| 3.89 | 8984.27 | 8987.88 | 8989.82 |
| 3.79 | 8984.23 | 8987.83 | 8989.79 |
| 3.69 | 8984.21 | 8987.79 | 8989.76 |
| 3.59 | 8984.18 | 8987.75 | 8989.74 |
| 3.49 | 8984.16 | 8987.71 | 8989.72 |
| 3.39 | 8984.13 | 8987.66 | 8989.70 |
| 3.29 | 8984.12 | 8987.62 | 8989.70 |
| 3.19 | 8984.10 | 8987.59 | 8989.69 |
| 3.09 | 8984.07 | 8987.52 | 8989.66 |
| 2.99 | 8984.06 | 8987.50 | 8989.66 |
| 2.89 | 8984.04 | 8987.45 | 8989.65 |
| 2.79 | 8984.02 | 8987.43 | 8989.64 |
| 2.69 | 8984.00 | 8987.39 | 8989.63 |
| 2.59 | 8983.97 | 8987.34 | 8989.61 |
| 2.49 | 8983.97 | 8987.33 | 8989.61 |
| 2.39 | 8983.95 | 8987.28 | 8989.59 |
| 2.29 | 8983.95 | 8987.26 | 8989.58 |
| 2.19 | 8983.93 | 8987.23 | 8989.58 |
| 2.09 | 8983.92 | 8987.19 | 8989.56 |
| 1.99 | 8983.92 | 8987.19 | 8989.56 |
| 1.89 | 8983.91 | 8987.16 | 8989.55 |
| 1.80 | 8983.91 | 8987.18 | 8989.57 |
| 1.80 | 8983.91 | 8987.15 | 8989.56 |
| 1.80 | 8983.90 | 8987.13 | 8989.54 |
| 1.80 | 8983.90 | 8987.12 | 8989.54 |
| 1.80 | 8983.90 | 8987.13 | 8989.55 |
| 1.80 | 8983.90 | 8987.11 | 8989.54 |
| 1.80 | 8983.89 | 8987.10 | 8989.54 |
| 1.80 | 8983.89 | 8987.09 | 8989.52 |

---



---



---



---

|      |         |         |         |
|------|---------|---------|---------|
| 1.80 | 8983.89 | 8987.11 | 8989.53 |
| 1.80 | 8983.88 | 8987.09 | 8989.53 |
| 1.80 | 8983.88 | 8987.07 | 8989.52 |
| 1.80 | 8983.88 | 8987.07 | 8989.52 |
| 1.81 | 8983.87 | 8987.05 | 8989.52 |
| 1.91 | 8983.88 | 8987.07 | 8989.52 |
| 2.01 | 8983.88 | 8987.09 | 8989.54 |
| 2.11 | 8983.88 | 8987.12 | 8989.56 |
| 2.21 | 8983.86 | 8987.16 | 8989.57 |
| 2.31 | 8983.86 | 8987.21 | 8989.60 |
| 2.41 | 8983.86 | 8987.30 | 8989.65 |
| 2.51 | 8983.84 | 8987.36 | 8989.67 |
| 2.61 | 8983.82 | 8987.40 | 8989.69 |
| 2.71 | 8983.81 | 8987.50 | 8989.73 |
| 2.81 | 8983.81 | 8987.54 | 8989.75 |
| 2.91 | 8983.81 | 8987.61 | 8989.78 |
| 2.97 | 8983.80 | 8987.59 | 8989.77 |
| 3.00 | 8983.80 | 8987.60 | 8989.79 |
| 3.03 | 8983.79 | 8987.59 | 8989.78 |
| 3.06 | 8983.79 | 8987.59 | 8989.79 |
| 3.09 | 8983.77 | 8987.58 | 8989.77 |
| 3.12 | 8983.78 | 8987.60 | 8989.78 |
| 3.15 | 8983.77 | 8987.58 | 8989.76 |
| 3.18 | 8983.76 | 8987.56 | 8989.76 |
| 3.21 | 8983.76 | 8987.56 | 8989.76 |
| 3.24 | 8983.75 | 8987.57 | 8989.77 |
| 3.27 | 8983.75 | 8987.58 | 8989.78 |
| 3.30 | 8983.75 | 8987.55 | 8989.77 |
| 3.33 | 8983.75 | 8987.56 | 8989.77 |
| 3.36 | 8983.74 | 8987.55 | 8989.76 |
| 3.39 | 8983.75 | 8987.55 | 8989.76 |
| 3.42 | 8983.74 | 8987.55 | 8989.77 |
| 3.45 | 8983.74 | 8987.54 | 8989.76 |
| 3.48 | 8983.75 | 8987.53 | 8989.76 |
| 3.51 | 8983.76 | 8987.57 | 8989.78 |
| 3.54 | 8983.74 | 8987.53 | 8989.75 |
| 3.57 | 8983.73 | 8987.52 | 8989.75 |
| 3.60 | 8983.75 | 8987.56 | 8989.78 |
| 3.63 | 8983.74 | 8987.55 | 8989.76 |
| 3.66 | 8983.74 | 8987.55 | 8989.77 |
| 3.69 | 8983.74 | 8987.56 | 8989.78 |
| 3.72 | 8983.72 | 8987.52 | 8989.76 |
| 3.75 | 8983.74 | 8987.54 | 8989.78 |
| 3.78 | 8983.74 | 8987.54 | 8989.77 |
| 3.81 | 8983.72 | 8987.55 | 8989.77 |
| 3.84 | 8983.71 | 8987.53 | 8989.76 |
| 3.87 | 8983.72 | 8987.53 | 8989.77 |

---



---

---



---

|      |         |         |         |
|------|---------|---------|---------|
| 3.90 | 8983.72 | 8987.54 | 8989.78 |
| 3.93 | 8983.72 | 8987.52 | 8989.77 |
| 3.96 | 8983.70 | 8987.52 | 8989.76 |
| 3.99 | 8983.70 | 8987.52 | 8989.76 |
| 4.02 | 8983.70 | 8987.52 | 8989.75 |
| 4.05 | 8983.70 | 8987.51 | 8989.76 |
| 4.08 | 8983.70 | 8987.51 | 8989.76 |
| 4.11 | 8983.70 | 8987.50 | 8989.74 |
| 4.14 | 8983.70 | 8987.51 | 8989.75 |
| 4.17 | 8983.71 | 8987.52 | 8989.76 |
| 4.20 | 8983.70 | 8987.51 | 8989.77 |
| 4.23 | 8983.70 | 8987.50 | 8989.75 |
| 4.26 | 8983.69 | 8987.50 | 8989.75 |
| 4.29 | 8983.68 | 8987.47 | 8989.73 |
| 4.32 | 8983.69 | 8987.51 | 8989.76 |
| 4.35 | 8983.69 | 8987.49 | 8989.75 |
| 4.38 | 8983.68 | 8987.48 | 8989.74 |
| 4.41 | 8983.69 | 8987.51 | 8989.76 |
| 4.44 | 8983.69 | 8987.49 | 8989.75 |
| 4.47 | 8983.68 | 8987.47 | 8989.75 |
| 4.50 | 8983.68 | 8987.49 | 8989.75 |
| 4.47 | 8983.69 | 8987.50 | 8989.76 |
| 4.44 | 8983.68 | 8987.50 | 8989.76 |
| 4.41 | 8983.68 | 8987.49 | 8989.75 |
| 4.38 | 8983.69 | 8987.50 | 8989.76 |
| 4.35 | 8983.68 | 8987.50 | 8989.75 |
| 4.32 | 8983.68 | 8987.48 | 8989.75 |
| 4.29 | 8983.67 | 8987.47 | 8989.75 |
| 4.26 | 8983.67 | 8987.48 | 8989.74 |
| 4.23 | 8983.68 | 8987.47 | 8989.74 |
| 4.20 | 8983.66 | 8987.46 | 8989.74 |
| 4.17 | 8983.67 | 8987.48 | 8989.75 |
| 4.14 | 8983.66 | 8987.47 | 8989.73 |
| 4.11 | 8983.66 | 8987.45 | 8989.73 |
| 4.08 | 8983.68 | 8987.49 | 8989.75 |
| 4.05 | 8983.66 | 8987.44 | 8989.73 |
| 4.02 | 8983.67 | 8987.48 | 8989.75 |
| 3.99 | 8983.68 | 8987.45 | 8989.75 |
| 3.96 | 8983.68 | 8987.45 | 8989.74 |
| 3.93 | 8983.69 | 8987.45 | 8989.74 |
| 3.90 | 8983.69 | 8987.48 | 8989.76 |
| 3.87 | 8983.68 | 8987.45 | 8989.74 |
| 3.84 | 8983.68 | 8987.42 | 8989.72 |
| 3.81 | 8983.69 | 8987.44 | 8989.73 |
| 3.78 | 8983.70 | 8987.43 | 8989.74 |
| 3.75 | 8983.69 | 8987.39 | 8989.71 |
| 3.72 | 8983.71 | 8987.40 | 8989.71 |

---



---

---



---

|      |         |         |         |
|------|---------|---------|---------|
| 3.69 | 8983.69 | 8987.35 | 8989.69 |
| 3.66 | 8983.68 | 8987.29 | 8989.66 |
| 3.63 | 8983.71 | 8987.30 | 8989.67 |
| 3.60 | 8983.72 | 8987.28 | 8989.66 |
| 3.57 | 8983.72 | 8987.26 | 8989.64 |
| 3.54 | 8983.73 | 8987.22 | 8989.63 |
| 3.51 | 8983.73 | 8987.19 | 8989.62 |
| 3.48 | 8983.74 | 8987.15 | 8989.61 |
| 3.45 | 8983.75 | 8987.13 | 8989.59 |
| 3.42 | 8983.75 | 8987.08 | 8989.56 |
| 3.39 | 8983.76 | 8987.09 | 8989.56 |
| 3.36 | 8983.77 | 8987.06 | 8989.55 |
| 3.33 | 8983.79 | 8987.05 | 8989.54 |
| 3.30 | 8983.80 | 8987.03 | 8989.53 |
| 3.27 | 8983.80 | 8987.01 | 8989.52 |
| 3.24 | 8983.82 | 8986.99 | 8989.51 |
| 3.21 | 8983.81 | 8986.95 | 8989.50 |
| 3.18 | 8983.83 | 8986.95 | 8989.49 |
| 3.15 | 8983.84 | 8986.96 | 8989.49 |
| 3.12 | 8983.85 | 8986.96 | 8989.48 |
| 3.09 | 8983.85 | 8986.96 | 8989.48 |
| 3.06 | 8983.86 | 8986.97 | 8989.47 |
| 3.03 | 8983.86 | 8986.96 | 8989.45 |
| 3.00 | 8983.88 | 8986.99 | 8989.47 |
| 2.97 | 8983.88 | 8986.98 | 8989.46 |
| 2.94 | 8983.89 | 8986.99 | 8989.46 |
| 2.91 | 8983.91 | 8987.04 | 8989.49 |
| 2.88 | 8983.93 | 8987.05 | 8989.49 |
| 2.85 | 8983.93 | 8987.07 | 8989.50 |
| 2.82 | 8983.93 | 8987.05 | 8989.49 |
| 2.79 | 8983.95 | 8987.11 | 8989.51 |
| 2.76 | 8983.98 | 8987.17 | 8989.53 |
| 2.73 | 8983.98 | 8987.20 | 8989.54 |
| 2.70 | 8984.00 | 8987.24 | 8989.55 |
| 2.67 | 8984.02 | 8987.28 | 8989.57 |
| 2.64 | 8984.05 | 8987.35 | 8989.60 |
| 2.61 | 8984.06 | 8987.38 | 8989.60 |
| 2.58 | 8984.09 | 8987.43 | 8989.63 |
| 2.55 | 8984.10 | 8987.47 | 8989.65 |
| 2.52 | 8984.12 | 8987.52 | 8989.66 |
| 2.49 | 8984.14 | 8987.55 | 8989.67 |
| 2.46 | 8984.15 | 8987.57 | 8989.67 |
| 2.43 | 8984.16 | 8987.60 | 8989.69 |
| 2.40 | 8984.17 | 8987.61 | 8989.68 |
| 2.37 | 8984.19 | 8987.65 | 8989.71 |
| 2.34 | 8984.19 | 8987.66 | 8989.71 |
| 2.31 | 8984.19 | 8987.67 | 8989.71 |

---



---

---



---

|      |         |         |         |
|------|---------|---------|---------|
| 2.28 | 8984.21 | 8987.70 | 8989.73 |
| 2.25 | 8984.21 | 8987.71 | 8989.73 |
| 2.22 | 8984.19 | 8987.68 | 8989.71 |
| 2.19 | 8984.21 | 8987.73 | 8989.74 |
| 2.16 | 8984.21 | 8987.73 | 8989.74 |
| 2.13 | 8984.19 | 8987.73 | 8989.74 |
| 2.10 | 8984.17 | 8987.73 | 8989.74 |
| 2.07 | 8984.14 | 8987.73 | 8989.74 |
| 2.04 | 8984.12 | 8987.73 | 8989.73 |
| 2.01 | 8984.09 | 8987.68 | 8989.73 |
| 1.98 | 8984.09 | 8987.66 | 8989.72 |
| 1.95 | 8984.11 | 8987.62 | 8989.72 |
| 1.92 | 8984.11 | 8987.54 | 8989.68 |
| 1.89 | 8984.15 | 8987.53 | 8989.65 |
| 1.86 | 8984.15 | 8987.50 | 8989.60 |
| 1.83 | 8984.18 | 8987.53 | 8989.59 |
| 1.80 | 8984.19 | 8987.58 | 8989.59 |
| 1.80 | 8984.19 | 8987.60 | 8989.58 |
| 1.80 | 8984.19 | 8987.65 | 8989.61 |
| 1.80 | 8984.17 | 8987.65 | 8989.62 |
| 1.80 | 8984.19 | 8987.67 | 8989.66 |
| 1.80 | 8984.17 | 8987.66 | 8989.66 |
| 1.80 | 8984.18 | 8987.67 | 8989.68 |
| 1.80 | 8984.17 | 8987.66 | 8989.68 |
| 1.80 | 8984.15 | 8987.62 | 8989.67 |
| 1.80 | 8984.15 | 8987.63 | 8989.69 |
| 1.80 | 8984.13 | 8987.60 | 8989.67 |
| 1.80 | 8984.13 | 8987.60 | 8989.69 |
| 1.80 | 8984.12 | 8987.57 | 8989.67 |
| 1.83 | 8984.09 | 8987.54 | 8989.65 |
| 1.86 | 8984.08 | 8987.50 | 8989.64 |
| 1.89 | 8984.07 | 8987.49 | 8989.65 |
| 1.92 | 8984.05 | 8987.45 | 8989.63 |
| 1.95 | 8984.01 | 8987.39 | 8989.60 |
| 1.98 | 8984.00 | 8987.37 | 8989.60 |
| 2.01 | 8983.98 | 8987.33 | 8989.57 |
| 2.04 | 8983.97 | 8987.30 | 8989.57 |
| 2.07 | 8983.96 | 8987.30 | 8989.59 |
| 2.10 | 8983.94 | 8987.25 | 8989.56 |
| 2.13 | 8983.94 | 8987.25 | 8989.56 |
| 2.16 | 8983.92 | 8987.21 | 8989.54 |
| 2.19 | 8983.91 | 8987.20 | 8989.55 |
| 2.22 | 8983.90 | 8987.17 | 8989.55 |
| 2.25 | 8983.89 | 8987.17 | 8989.55 |
| 2.28 | 8983.85 | 8987.08 | 8989.50 |
| 2.31 | 8983.87 | 8987.12 | 8989.53 |
| 2.34 | 8983.86 | 8987.09 | 8989.52 |

---



---

---



---

|      |         |         |         |
|------|---------|---------|---------|
| 2.37 | 8983.85 | 8987.08 | 8989.52 |
| 2.40 | 8983.85 | 8987.07 | 8989.52 |
| 2.43 | 8983.83 | 8987.03 | 8989.50 |
| 2.46 | 8983.82 | 8987.03 | 8989.50 |
| 2.49 | 8983.80 | 8986.99 | 8989.48 |
| 2.52 | 8983.82 | 8986.99 | 8989.49 |
| 2.55 | 8983.81 | 8986.98 | 8989.49 |
| 2.58 | 8983.81 | 8986.95 | 8989.47 |
| 2.61 | 8983.80 | 8986.94 | 8989.48 |
| 2.64 | 8983.80 | 8986.92 | 8989.46 |
| 2.67 | 8983.80 | 8986.90 | 8989.45 |
| 2.70 | 8983.80 | 8986.90 | 8989.45 |
| 2.73 | 8983.80 | 8986.91 | 8989.45 |
| 2.76 | 8983.79 | 8986.90 | 8989.45 |
| 2.79 | 8983.80 | 8986.92 | 8989.47 |
| 2.82 | 8983.80 | 8986.93 | 8989.47 |
| 2.85 | 8983.79 | 8986.91 | 8989.46 |
| 2.88 | 8983.79 | 8986.92 | 8989.46 |
| 2.91 | 8983.79 | 8986.94 | 8989.48 |
| 2.94 | 8983.79 | 8986.96 | 8989.50 |
| 2.97 | 8983.78 | 8986.96 | 8989.50 |
| 3.00 | 8983.78 | 8987.00 | 8989.51 |
| 3.03 | 8983.77 | 8987.02 | 8989.52 |
| 3.06 | 8983.77 | 8987.05 | 8989.54 |
| 3.09 | 8983.76 | 8987.10 | 8989.56 |
| 3.12 | 8983.74 | 8987.08 | 8989.55 |
| 3.15 | 8983.75 | 8987.13 | 8989.58 |
| 3.18 | 8983.75 | 8987.18 | 8989.59 |
| 3.21 | 8983.75 | 8987.19 | 8989.61 |
| 3.24 | 8983.74 | 8987.19 | 8989.61 |
| 3.27 | 8983.74 | 8987.21 | 8989.62 |
| 3.30 | 8983.74 | 8987.26 | 8989.64 |
| 3.33 | 8983.73 | 8987.26 | 8989.64 |
| 3.36 | 8983.73 | 8987.25 | 8989.63 |
| 3.39 | 8983.73 | 8987.30 | 8989.66 |
| 3.42 | 8983.72 | 8987.28 | 8989.66 |
| 3.45 | 8983.72 | 8987.33 | 8989.68 |
| 3.48 | 8983.72 | 8987.34 | 8989.68 |
| 3.51 | 8983.73 | 8987.40 | 8989.71 |
| 3.54 | 8983.72 | 8987.38 | 8989.70 |
| 3.57 | 8983.71 | 8987.41 | 8989.71 |
| 3.60 | 8983.70 | 8987.40 | 8989.71 |
| 3.63 | 8983.70 | 8987.42 | 8989.71 |
| 3.66 | 8983.71 | 8987.43 | 8989.73 |
| 3.69 | 8983.70 | 8987.44 | 8989.73 |
| 3.72 | 8983.69 | 8987.43 | 8989.73 |
| 3.75 | 8983.71 | 8987.46 | 8989.75 |

---



---

---



---

|      |         |         |         |
|------|---------|---------|---------|
| 3.78 | 8984.11 | 8988.24 | 8990.08 |
| 3.81 | 8984.09 | 8988.20 | 8990.07 |
| 3.84 | 8984.08 | 8988.20 | 8990.06 |
| 3.87 | 8984.08 | 8988.20 | 8990.07 |
| 3.90 | 8984.08 | 8988.21 | 8990.07 |
| 3.93 | 8984.07 | 8988.20 | 8990.06 |
| 3.96 | 8984.05 | 8988.16 | 8990.05 |
| 3.99 | 8984.00 | 8988.09 | 8990.02 |
| 4.02 | 8984.02 | 8988.04 | 8989.97 |
| 4.05 | 8984.05 | 8988.13 | 8990.01 |
| 4.08 | 8984.05 | 8988.14 | 8990.02 |
| 4.11 | 8984.06 | 8988.14 | 8990.03 |
| 4.14 | 8984.07 | 8988.14 | 8990.02 |
| 4.17 | 8984.06 | 8988.13 | 8990.02 |
| 4.20 | 8984.06 | 8988.13 | 8990.02 |
| 4.23 | 8984.07 | 8988.15 | 8990.04 |
| 4.26 | 8984.07 | 8988.15 | 8990.04 |
| 4.29 | 8984.06 | 8988.15 | 8990.03 |
| 4.32 | 8984.07 | 8988.14 | 8990.03 |
| 4.35 | 8984.08 | 8988.15 | 8990.03 |
| 4.38 | 8984.08 | 8988.15 | 8990.03 |
| 4.41 | 8984.09 | 8988.18 | 8990.05 |
| 4.44 | 8984.09 | 8988.16 | 8990.04 |
| 4.47 | 8984.09 | 8988.16 | 8990.04 |
| 4.50 | 8984.08 | 8988.14 | 8990.03 |
| 4.47 | 8984.10 | 8988.16 | 8990.04 |
| 4.44 | 8984.09 | 8988.16 | 8990.03 |
| 4.41 | 8984.10 | 8988.16 | 8990.04 |
| 4.38 | 8984.10 | 8988.15 | 8990.03 |
| 4.35 | 8984.10 | 8988.15 | 8990.04 |
| 4.32 | 8984.09 | 8988.15 | 8990.03 |
| 4.29 | 8984.10 | 8988.15 | 8990.03 |
| 4.26 | 8984.09 | 8988.15 | 8990.03 |
| 4.23 | 8984.10 | 8988.16 | 8990.03 |
| 4.20 | 8984.11 | 8988.14 | 8990.03 |
| 4.17 | 8984.12 | 8988.16 | 8990.03 |
| 4.14 | 8984.11 | 8988.13 | 8990.01 |
| 4.11 | 8984.11 | 8988.13 | 8990.02 |
| 4.08 | 8984.13 | 8988.15 | 8990.04 |
| 4.05 | 8984.11 | 8988.13 | 8990.02 |
| 4.02 | 8984.12 | 8988.12 | 8990.01 |
| 3.99 | 8984.12 | 8988.12 | 8990.01 |
| 3.96 | 8984.12 | 8988.12 | 8990.01 |
| 3.93 | 8984.12 | 8988.11 | 8990.02 |
| 3.90 | 8984.11 | 8988.09 | 8990.00 |
| 3.87 | 8984.11 | 8988.06 | 8989.97 |
| 3.84 | 8984.11 | 8988.07 | 8989.99 |

---



---

---



---

|      |         |         |         |
|------|---------|---------|---------|
| 3.81 | 8984.13 | 8988.06 | 8989.98 |
| 3.78 | 8984.13 | 8988.05 | 8989.97 |
| 3.75 | 8984.13 | 8988.05 | 8989.96 |
| 3.72 | 8984.13 | 8988.02 | 8989.93 |
| 3.69 | 8984.13 | 8988.02 | 8989.92 |
| 3.66 | 8984.13 | 8988.00 | 8989.90 |
| 3.63 | 8984.14 | 8987.96 | 8989.87 |
| 3.60 | 8984.14 | 8987.96 | 8989.87 |
| 3.57 | 8984.15 | 8987.95 | 8989.87 |
| 3.54 | 8984.14 | 8987.93 | 8989.86 |
| 3.51 | 8984.15 | 8987.94 | 8989.87 |
| 3.48 | 8984.16 | 8987.93 | 8989.87 |
| 3.45 | 8984.15 | 8987.92 | 8989.86 |
| 3.42 | 8984.15 | 8987.92 | 8989.87 |
| 3.39 | 8984.14 | 8987.89 | 8989.87 |
| 3.36 | 8984.13 | 8987.88 | 8989.87 |
| 3.33 | 8984.12 | 8987.88 | 8989.88 |
| 3.30 | 8984.11 | 8987.88 | 8989.88 |
| 3.27 | 8984.09 | 8987.89 | 8989.88 |
| 3.24 | 8984.07 | 8987.90 | 8989.89 |
| 3.21 | 8984.05 | 8987.91 | 8989.90 |
| 3.18 | 8984.03 | 8987.90 | 8989.90 |
| 3.15 | 8984.02 | 8987.88 | 8989.90 |
| 3.12 | 8984.02 | 8987.86 | 8989.89 |
| 3.09 | 8984.00 | 8987.85 | 8989.88 |
| 3.06 | 8984.01 | 8987.84 | 8989.88 |
| 3.03 | 8984.01 | 8987.84 | 8989.89 |
| 3.00 | 8984.02 | 8987.85 | 8989.89 |
| 2.97 | 8984.02 | 8987.83 | 8989.87 |
| 2.94 | 8984.02 | 8987.82 | 8989.87 |
| 2.91 | 8984.01 | 8987.80 | 8989.86 |
| 2.88 | 8984.01 | 8987.76 | 8989.84 |
| 2.85 | 8984.00 | 8987.75 | 8989.82 |
| 2.82 | 8983.98 | 8987.76 | 8989.83 |
| 2.79 | 8983.95 | 8987.82 | 8989.85 |
| 2.76 | 8983.93 | 8987.83 | 8989.85 |
| 2.73 | 8983.91 | 8987.82 | 8989.85 |
| 2.70 | 8983.88 | 8987.78 | 8989.83 |
| 2.67 | 8983.88 | 8987.76 | 8989.83 |
| 2.64 | 8983.85 | 8987.71 | 8989.81 |
| 2.61 | 8983.84 | 8987.69 | 8989.80 |
| 2.58 | 8983.82 | 8987.66 | 8989.79 |
| 2.55 | 8983.83 | 8987.67 | 8989.81 |
| 2.52 | 8983.81 | 8987.64 | 8989.81 |
| 2.49 | 8983.81 | 8987.62 | 8989.79 |
| 2.46 | 8983.79 | 8987.60 | 8989.77 |
| 2.43 | 8983.79 | 8987.60 | 8989.78 |

---



---

|      |         |         |         |
|------|---------|---------|---------|
| 2.40 | 8983.78 | 8987.56 | 8989.75 |
| 2.37 | 8983.78 | 8987.59 | 8989.77 |
| 2.34 | 8983.79 | 8987.60 | 8989.78 |
| 2.31 | 8983.77 | 8987.56 | 8989.76 |
| 2.28 | 8983.78 | 8987.57 | 8989.77 |
| 2.25 | 8983.77 | 8987.56 | 8989.78 |
| 2.22 | 8983.76 | 8987.56 | 8989.76 |
| 2.19 | 8983.75 | 8987.56 | 8989.76 |
| 2.16 | 8983.75 | 8987.55 | 8989.76 |
| 2.13 | 8983.75 | 8987.55 | 8989.77 |
| 2.10 | 8983.75 | 8987.54 | 8989.76 |
| 2.07 | 8983.75 | 8987.56 | 8989.78 |
| 2.04 | 8983.75 | 8987.56 | 8989.77 |
| 2.01 | 8983.73 | 8987.53 | 8989.75 |
| 1.98 | 8983.74 | 8987.54 | 8989.75 |
| 1.95 | 8983.73 | 8987.55 | 8989.76 |
| 1.92 | 8983.74 | 8987.55 | 8989.76 |
| 1.89 | 8983.73 | 8987.54 | 8989.76 |
| 1.86 | 8983.73 | 8987.56 | 8989.77 |
| 1.83 | 8983.72 | 8987.55 | 8989.78 |
| 1.80 | 8983.72 | 8987.54 | 8989.77 |
| 1.80 | 8983.73 | 8987.55 | 8989.79 |
| 1.80 | 8983.71 | 8987.55 | 8989.78 |
| 1.80 | 8983.71 | 8987.54 | 8989.78 |
| 1.80 | 8983.72 | 8987.54 | 8989.78 |
| 1.80 | 8983.71 | 8987.53 | 8989.78 |
| 1.80 | 8983.72 | 8987.54 | 8989.79 |
| 1.80 | 8983.71 | 8987.55 | 8989.79 |
| 1.80 | 8983.72 | 8987.54 | 8989.79 |
| 1.80 | 8983.72 | 8987.53 | 8989.79 |
| 1.80 | 8983.71 | 8987.54 | 8989.79 |
| 1.80 | 8983.72 | 8987.54 | 8989.80 |
| 1.80 | 8983.70 | 8987.52 | 8989.78 |
| 1.83 | 8983.71 | 8987.53 | 8989.79 |
| 1.86 | 8983.71 | 8987.54 | 8989.79 |
| 1.89 | 8983.71 | 8987.53 | 8989.78 |
| 1.92 | 8983.70 | 8987.53 | 8989.79 |
| 1.95 | 8983.70 | 8987.53 | 8989.79 |



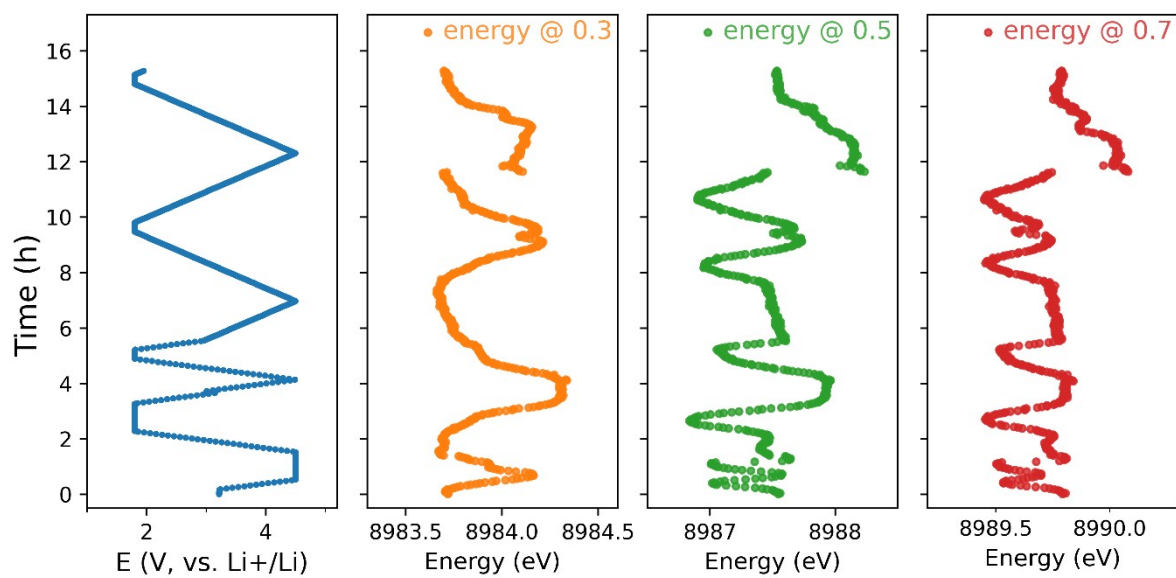

**Figure S 11:** The corresponding evolution of energy position corresponding to the edge step of 0.3, 0.5 and 0.7.
