# Supplementary figures and images for: Exploring the chemical and structural change of copper porphyrins upon charging by means of synchrotron X-ray absorption spectroscopy
Source: Royal Society of Chemistry journal article supplement (doi:10.1039/d4ya00242c), 2024-01-01

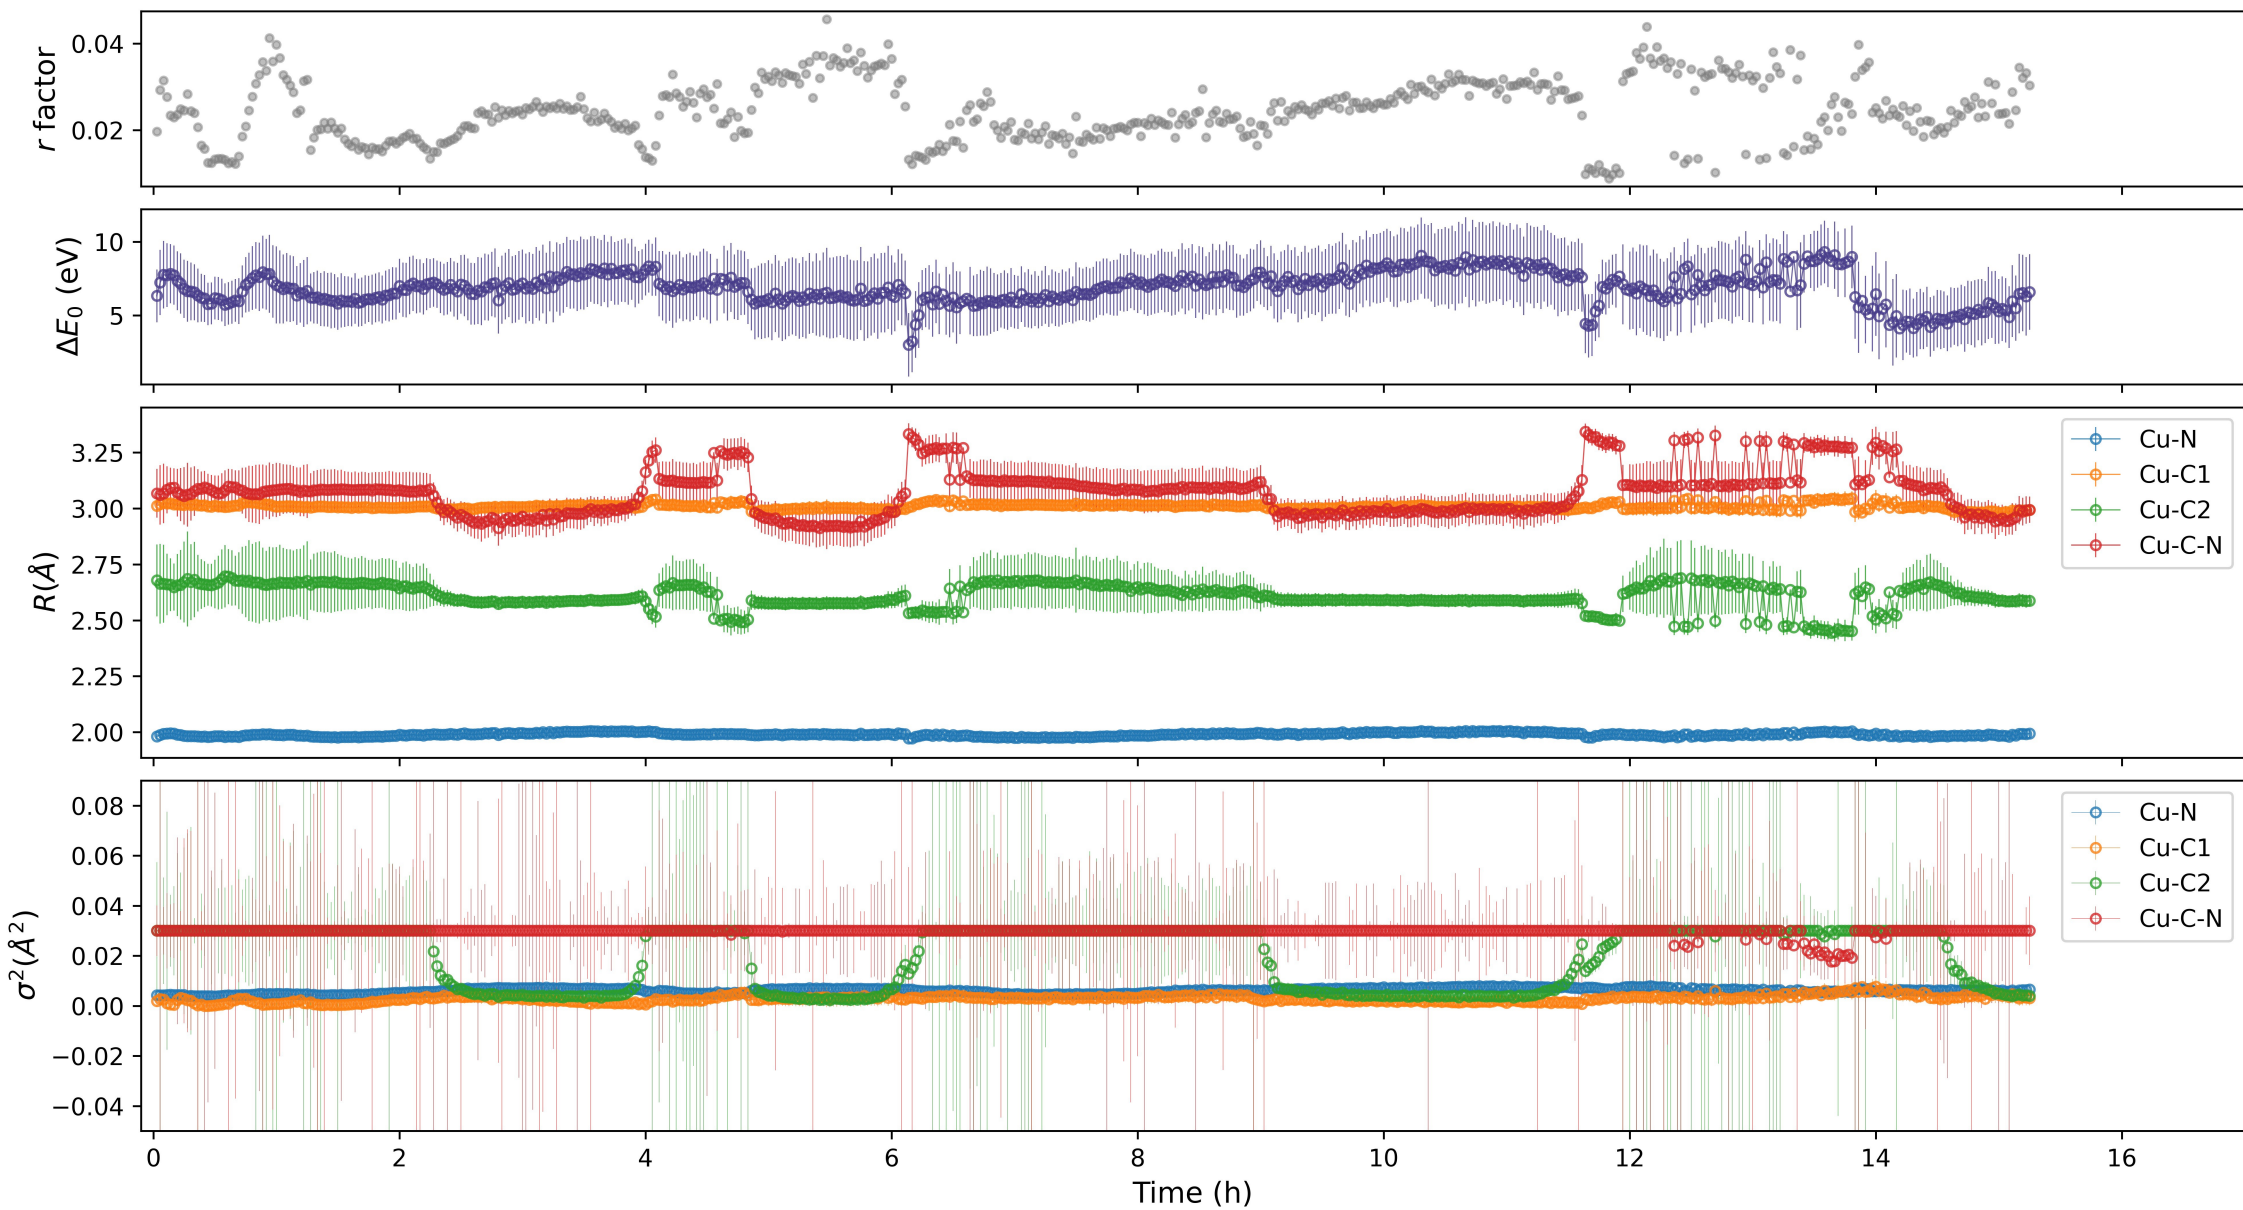

Supplement: d4ya00242c1.pdf [file d4ya00242c1.pdf]

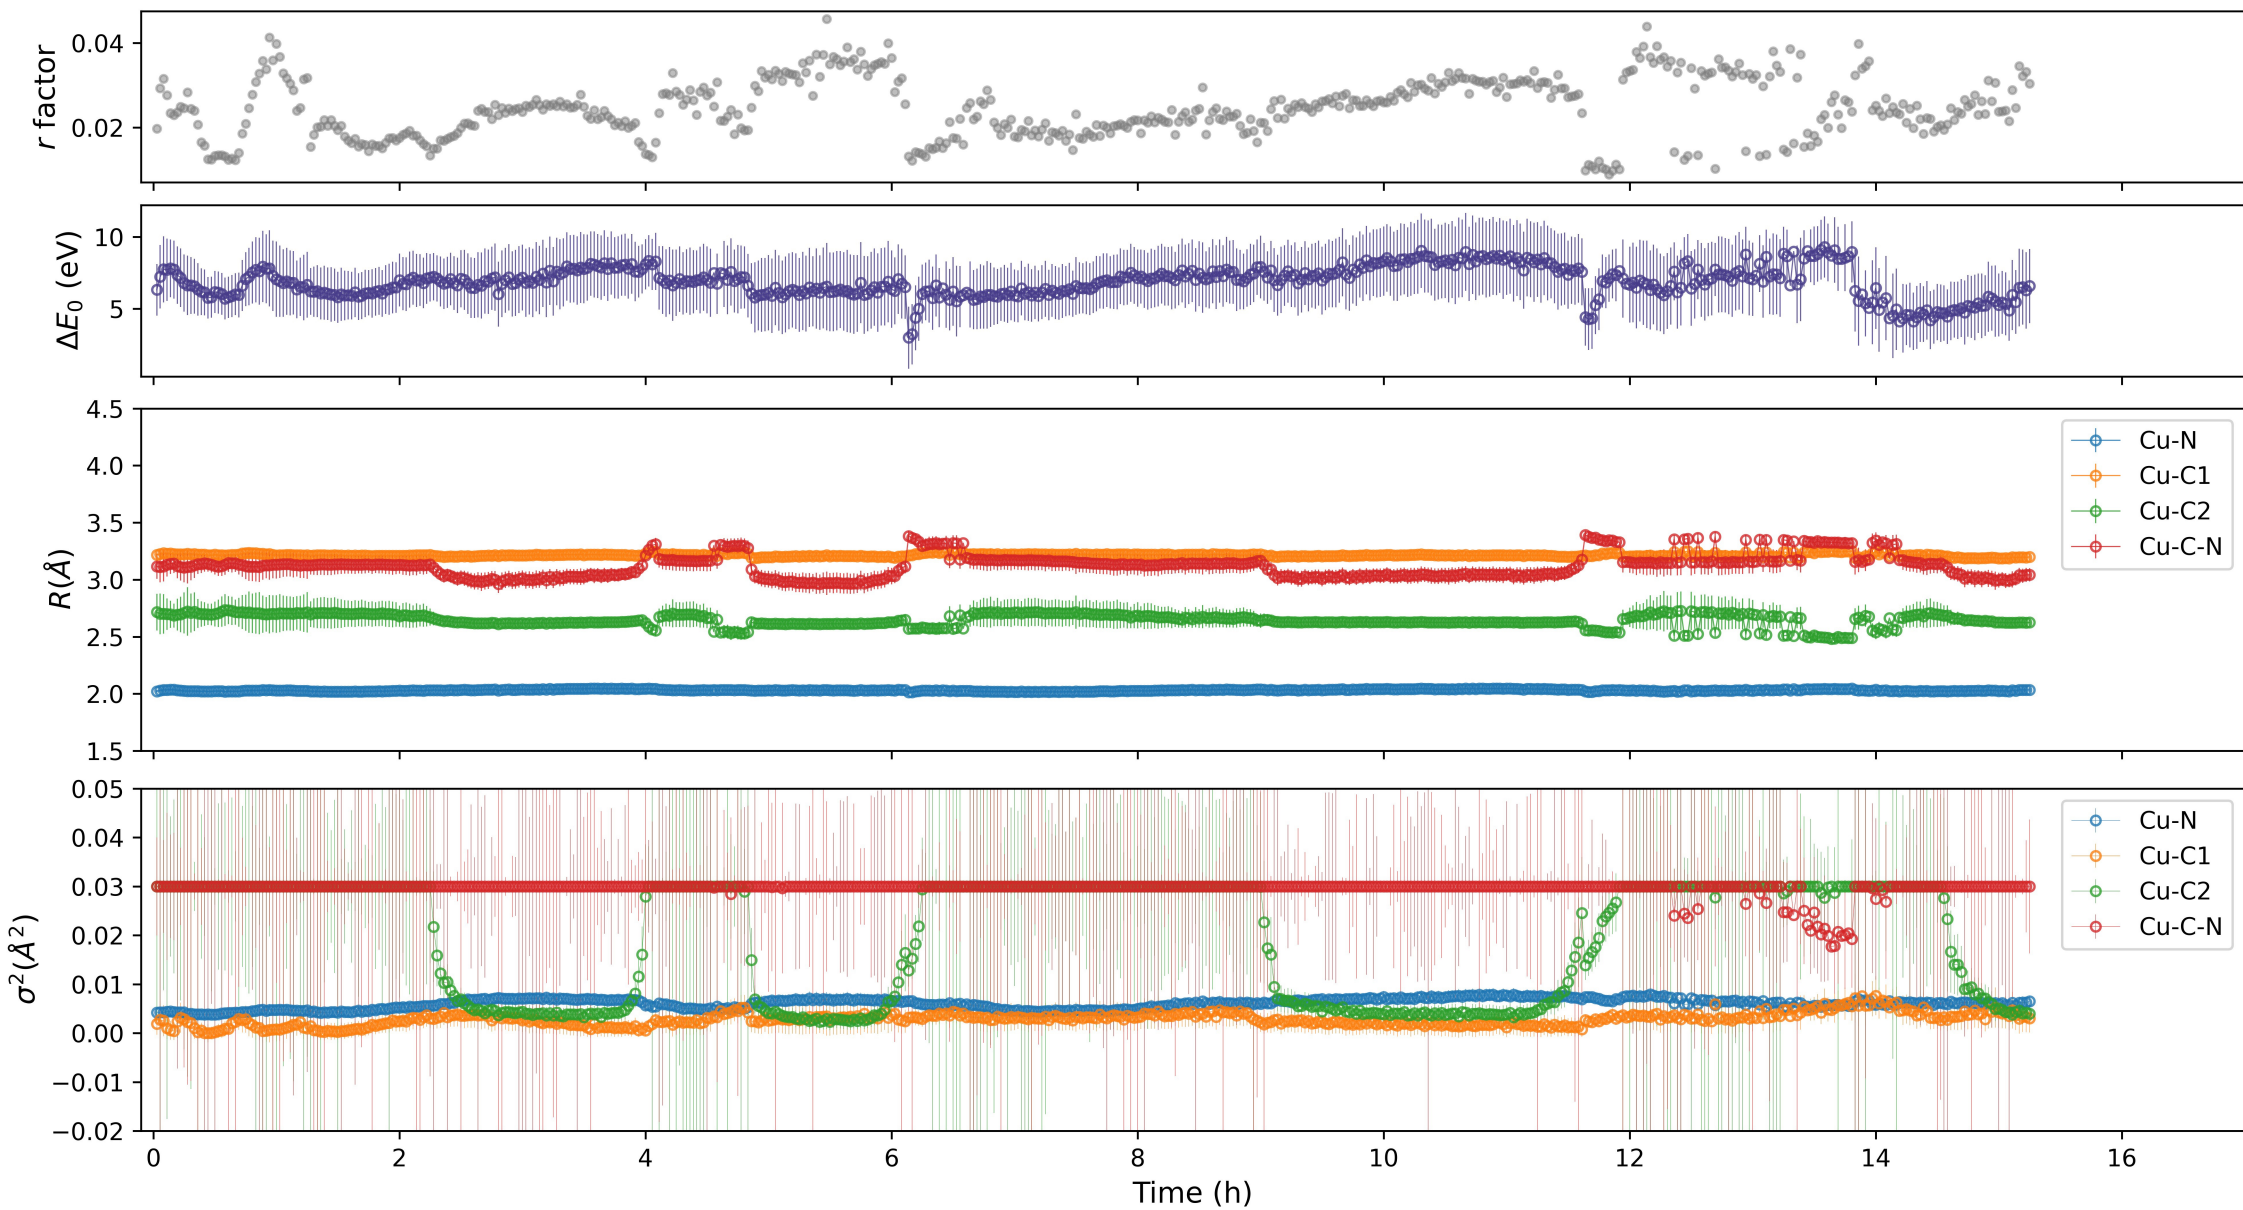

Supplement: d4ya00242c2.pdf [file d4ya00242c2.pdf]

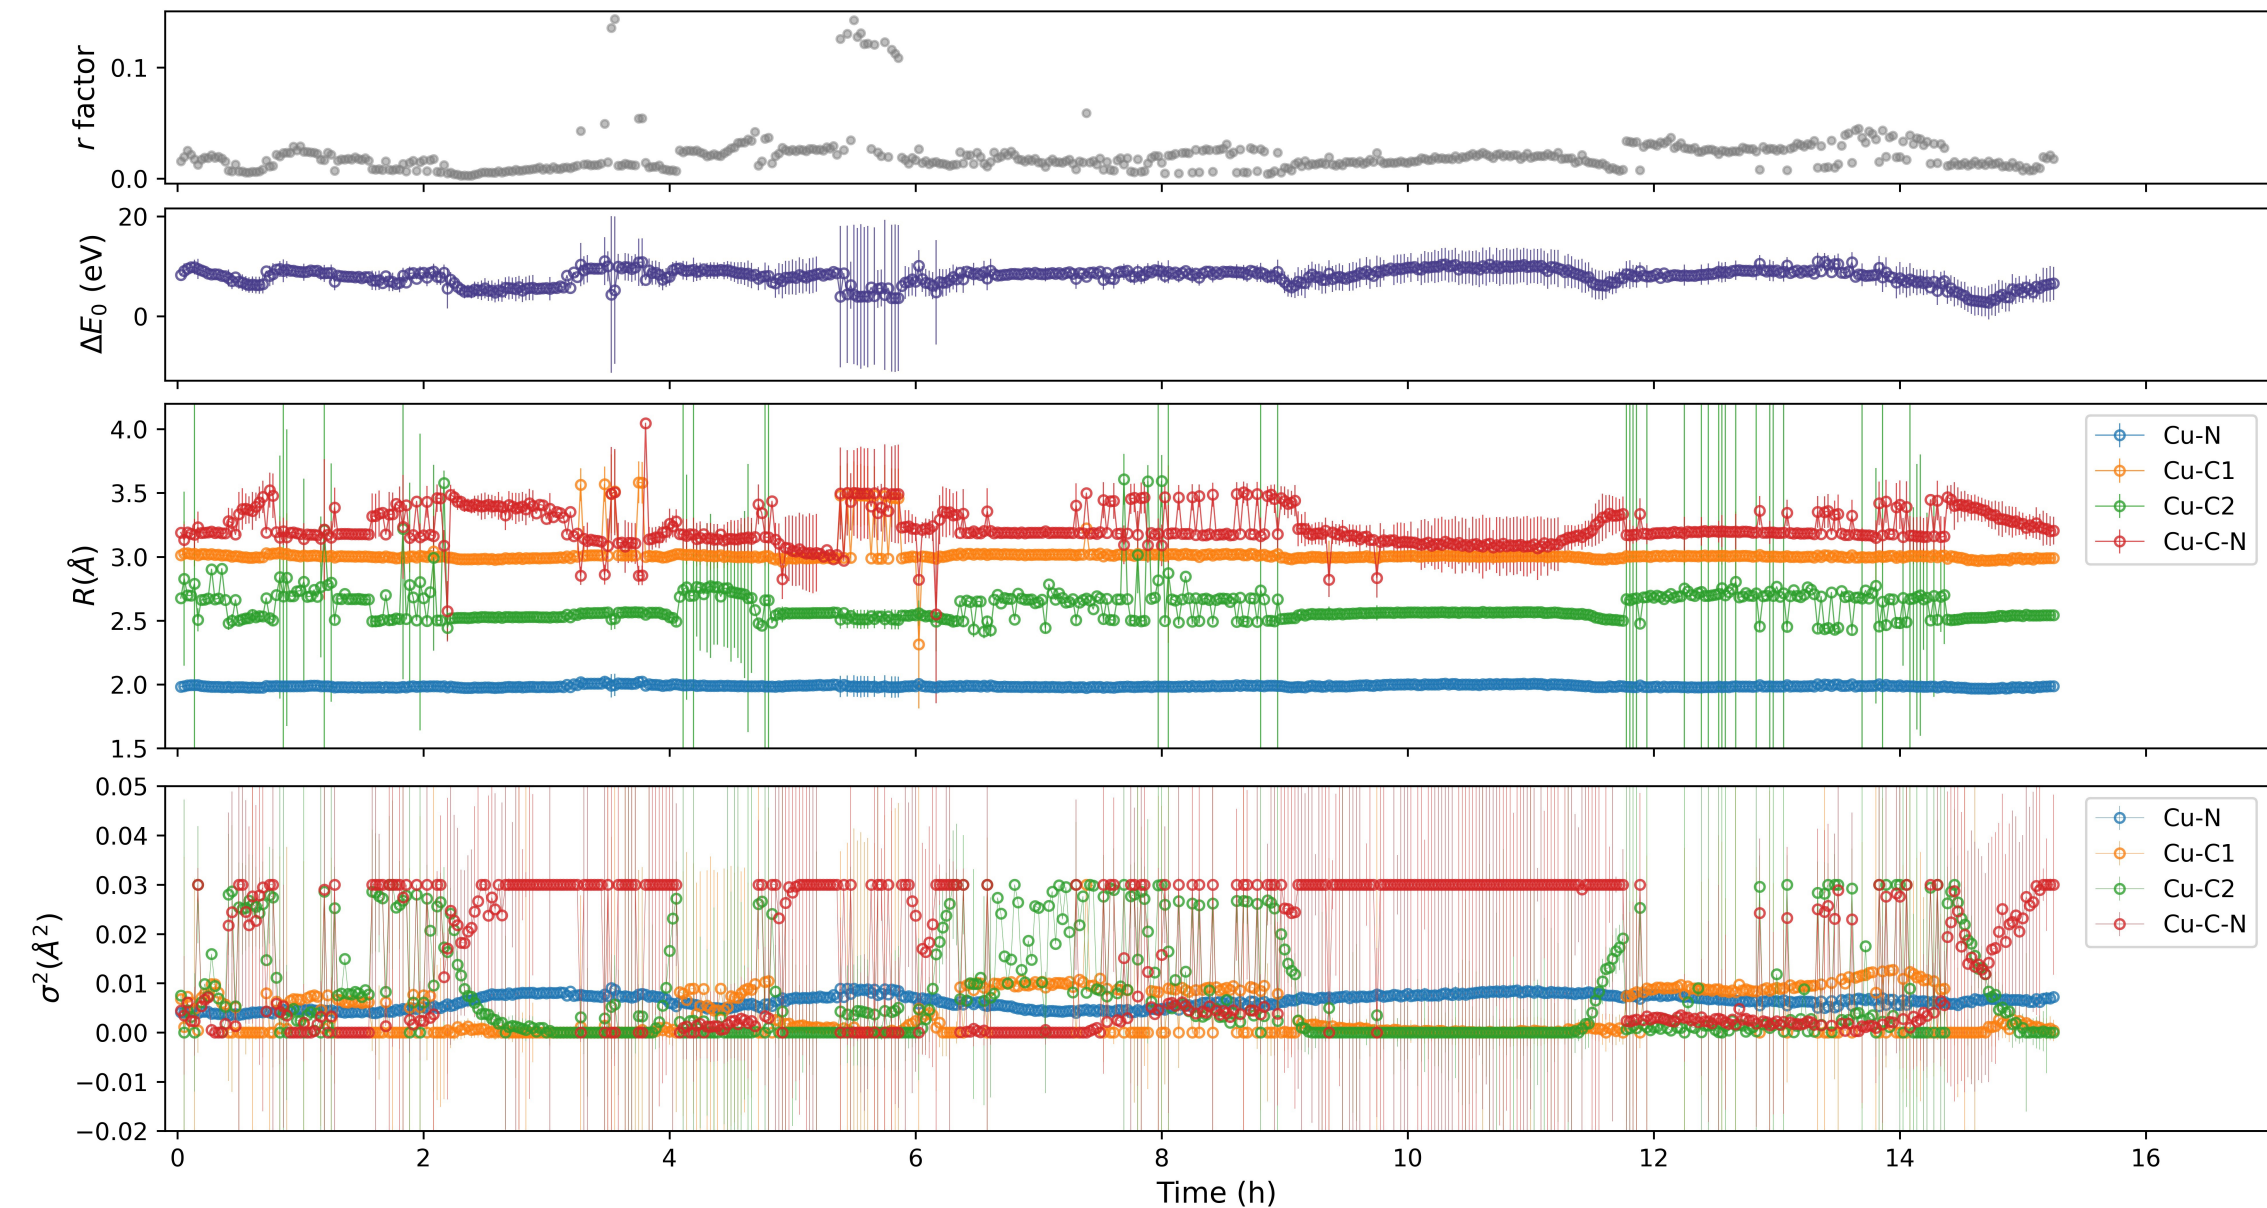

Supplement: d4ya00242c3.pdf [file d4ya00242c3.pdf]

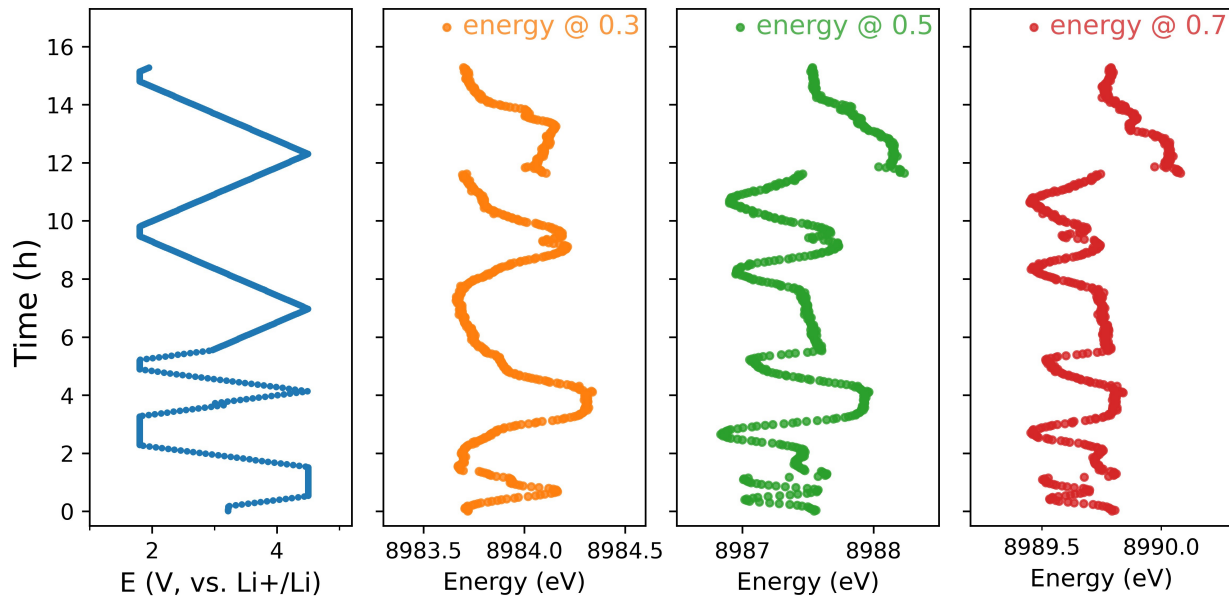

Supplement: d4ya00242c4.pdf [file d4ya00242c4.pdf]

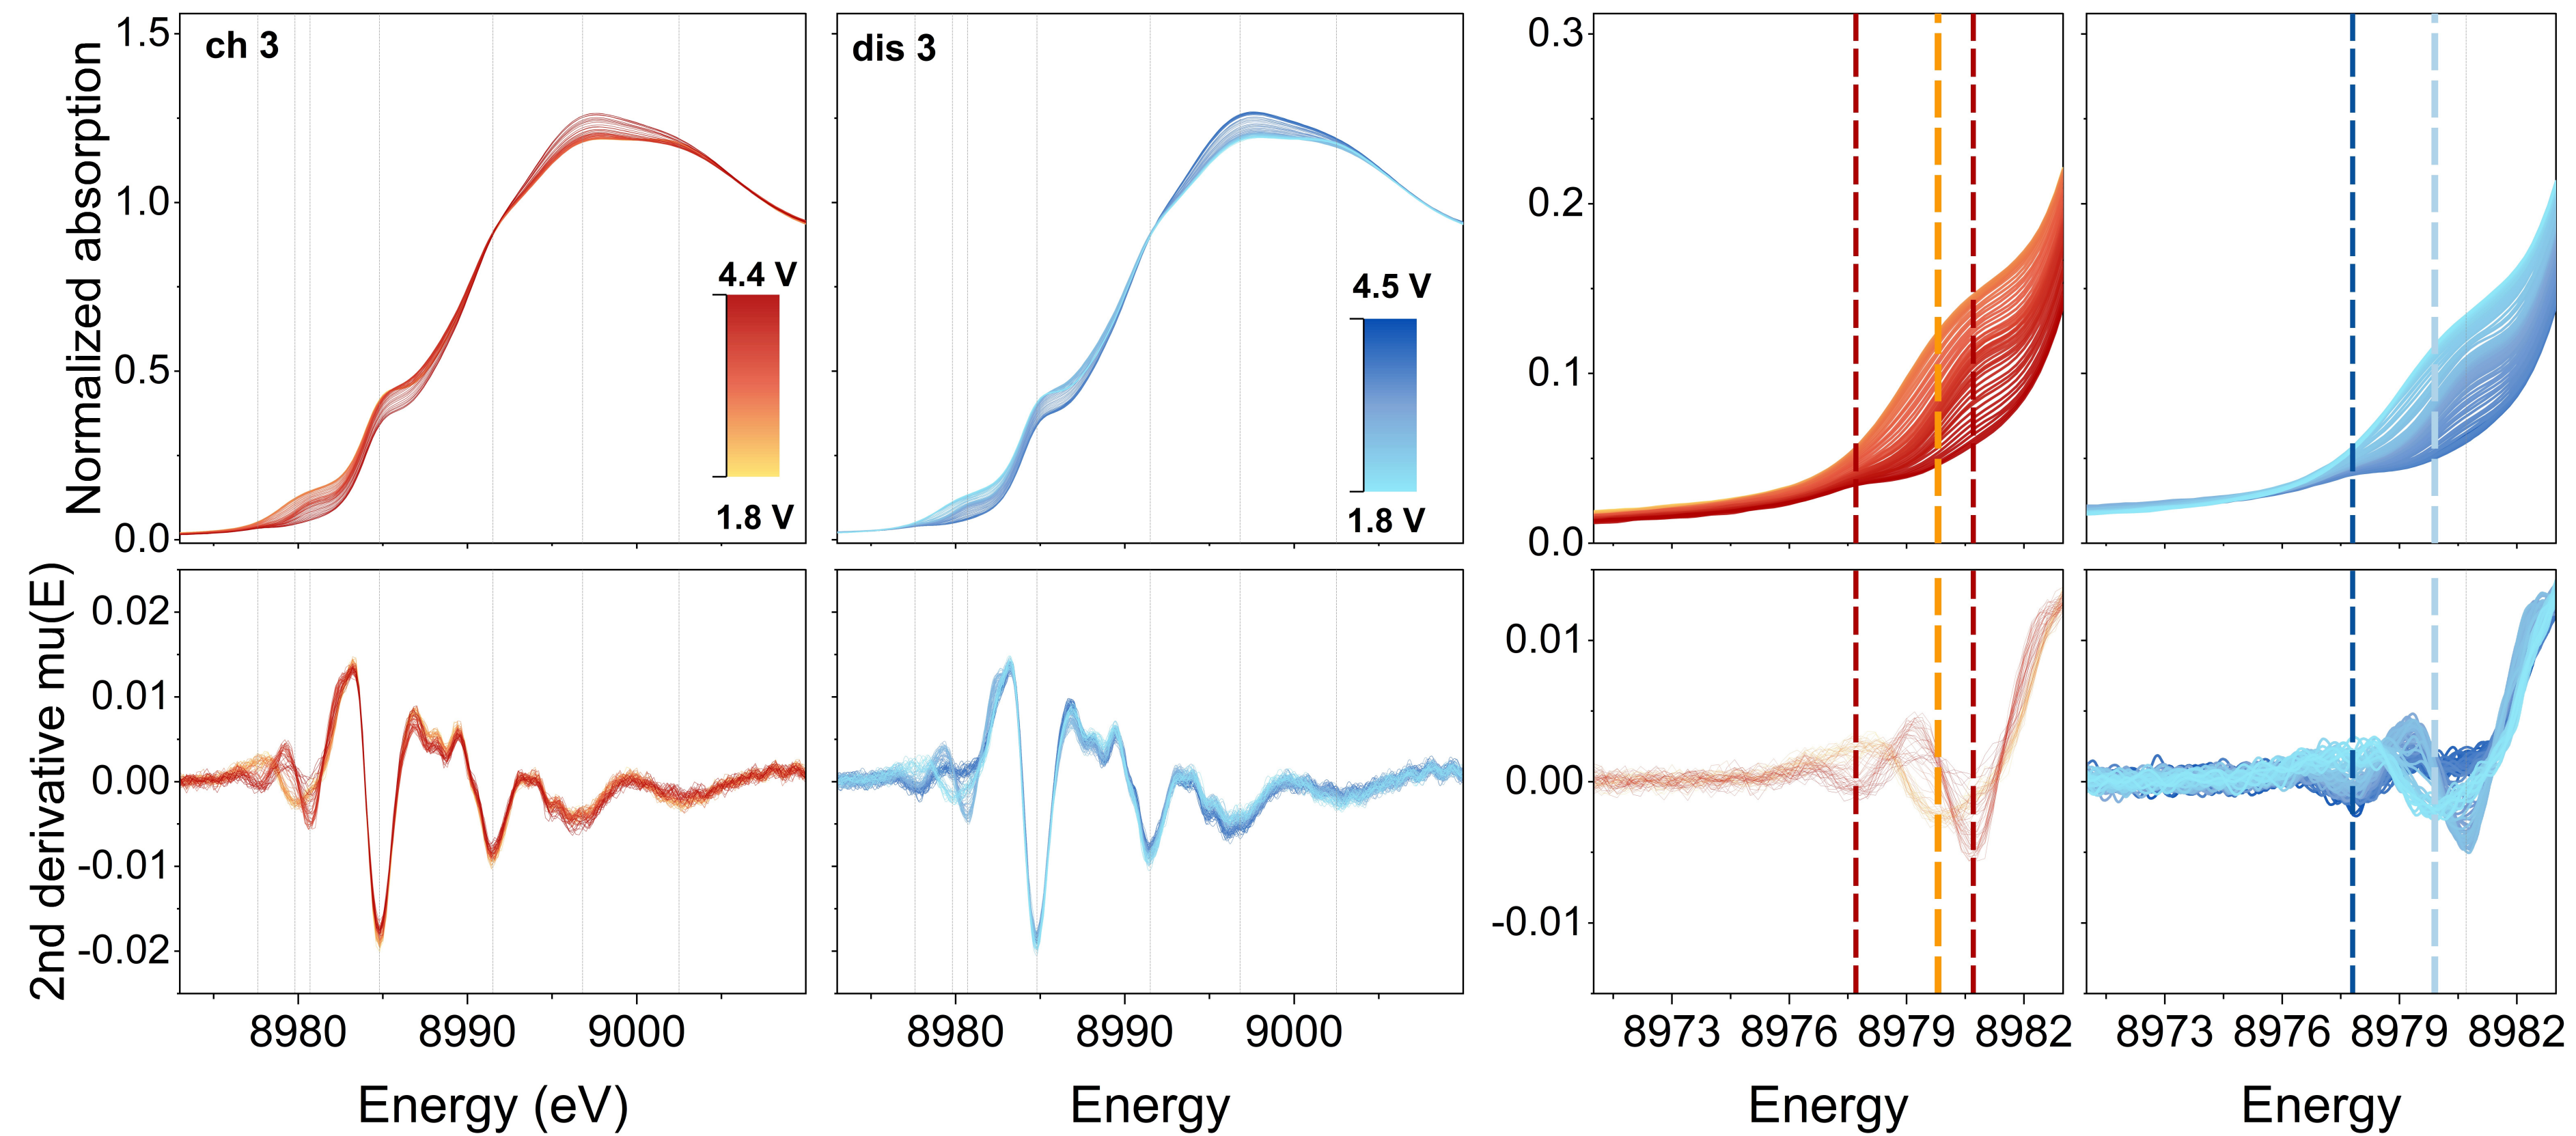

Supplement: d4ya00242c5.pdf [file d4ya00242c5.pdf]

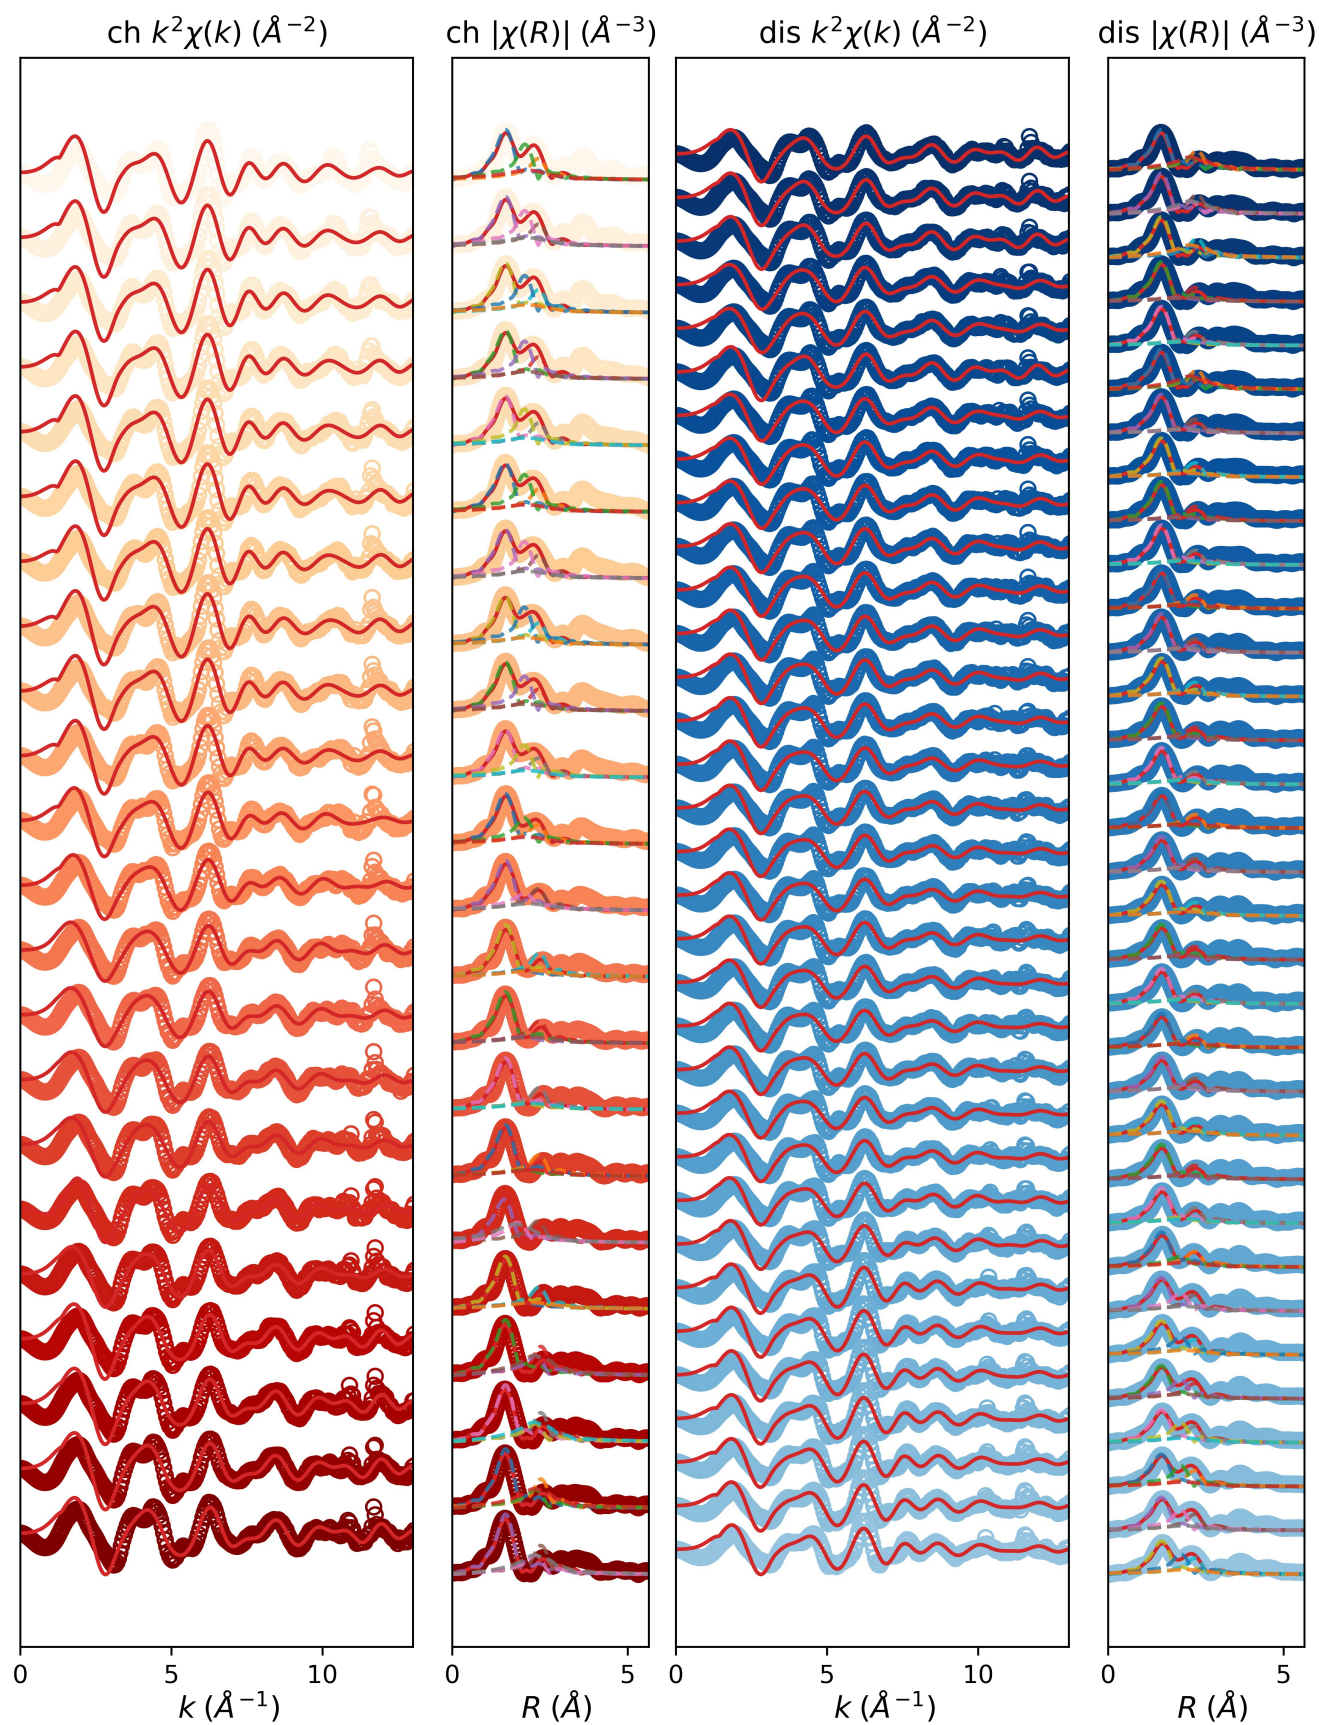

Supplement: d4ya00242c6.pdf [file d4ya00242c6.pdf]
